# Supplementary material for: Prehospital and in-hospital delays to care and associated factors in patients with STEMI: an observational study in 101 non-PCI hospitals in China
Source: PubMed Central journal article supplement — BMJ Open. 2019 Nov 10;9(11):e031918. doi: 10.1136/bmjopen-2019-031918 (PMC6858215; doi:10.1136/bmjopen-2019-031918), 2019-11-10
Supplement: bmjopen-2019-031918.draft_revisions.pdf [file bmjopen-2019-031918.draft_revisions.pdf]

# BMJ Open

BMJ Open is committed to open peer review. As part of this commitment we make the peer review history of every article we publish publicly available.

When an article is published we post the peer reviewers' comments and the authors' responses online. We also post the versions of the paper that were used during peer review. These are the versions that the peer review comments apply to.

The versions of the paper that follow are the versions that were submitted during the peer review process. They are not the versions of record or the final published versions. They should not be cited or distributed as the published version of this manuscript.

BMJ Open is an open access journal and the full, final, typeset and author-corrected version of record of the manuscript is available on our site with no access controls, subscription charges or pay-per-view fees (<http://bmjopen.bmj.com>).

If you have any questions on BMJ Open's open peer review process please email [info.bmjopen@bmj.com](mailto:info.bmjopen@bmj.com)

# BMJ Open

## Pre- and in-hospital delays to care and associated factors in STEMI patients: an observational study at 101 non-PCI hospitals in China

|                               |                                                                                                                                                                                                                                                                                                                                                                                                                                                                                                                                                                                                                                                                            |
|-------------------------------|----------------------------------------------------------------------------------------------------------------------------------------------------------------------------------------------------------------------------------------------------------------------------------------------------------------------------------------------------------------------------------------------------------------------------------------------------------------------------------------------------------------------------------------------------------------------------------------------------------------------------------------------------------------------------|
| Journal:                      | <i>BMJ Open</i>                                                                                                                                                                                                                                                                                                                                                                                                                                                                                                                                                                                                                                                            |
| Manuscript ID                 | bmjopen-2019-031918                                                                                                                                                                                                                                                                                                                                                                                                                                                                                                                                                                                                                                                        |
| Article Type:                 | Research                                                                                                                                                                                                                                                                                                                                                                                                                                                                                                                                                                                                                                                                   |
| Date Submitted by the Author: | 25-May-2019                                                                                                                                                                                                                                                                                                                                                                                                                                                                                                                                                                                                                                                                |
| Complete List of Authors:     | Feng, Lin; Peking University First Hospital, ; Peking University Clinical Research Institute,<br>Li , Min; Peking University School of Public Health , Epidemiology and Biostatistics<br>Xie , Wuxiang<br>Zhang, Aihua; The George Institute for Global Health at Peking University Health Science Center<br>Lei, Licheng; Capital Medical University Affiliated Beijing Shijitan Hospital, The Department of Cardiology<br>Li , Xian; The George Institute for Global Health at Peking University Health Science Center<br>Gao, R; Fu Wai Hospital, National Center for Cardiovascular Diseases,<br>Wu, Yangfeng; Peking University School of Public Health, Epidemiology |
| Keywords:                     | Myocardial infarction < CARDIOLOGY, delays, associated factors                                                                                                                                                                                                                                                                                                                                                                                                                                                                                                                                                                                                             |
|                               |                                                                                                                                                                                                                                                                                                                                                                                                                                                                                                                                                                                                                                                                            |

SCHOLARONE™  
Manuscripts

1  
2  
3  
4 **Pre- and in-hospital delays to care and associated factors in STEMI patients: an**  
5  
6 **observational study at 101 non-PCI hospitals in China**  
7  
8

9 **Authors:** Lin Feng (BM)<sup>1,2</sup>, Min Li (PhD)<sup>3</sup>, Wuxiang Xie (PhD)<sup>2</sup>, Aihua Zhang (BM)<sup>4</sup>,  
10  
11 Licheng Lei (MD)<sup>5</sup>, Xian Li (MSc)<sup>4</sup>, Runlin Gao (MD)<sup>6</sup>, Yangfeng Wu (PhD)<sup>2,4</sup> \*  
12  
13

14 <sup>1</sup> Peking University First Hospital, Beijing, China;  
15

16  
17 <sup>2</sup> Peking University Clinical Research Institute, Peking University Health Science Center,  
18  
19 Beijing, China;  
20  
21

22 <sup>3</sup> Clinical Epidemiology and EBM Center, Beijing Friendship Hospital, Capital Medical  
23  
24 University, National Clinical Research Center for Digestive Disease, Beijing, China;  
25  
26

27 <sup>4</sup> The George Institute for Global Health at Peking University Health Science Center,  
28  
29 Beijing, China;  
30  
31

32 <sup>5</sup> The Department of Cardiology, Beijing Shijitan Hospital, Capital Medical University,  
33  
34 Beijing, China;  
35  
36

37 <sup>6</sup> The Department of Cardiology, Cardiovascular Institute and Fuwai Hospital, Chinese  
38  
39 Academy of Medical Sciences and Peking Union Medical College, Beijing, China;  
40  
41

42  
43 \*Corresponding Author: Yangfeng Wu, wuyf@bjmu.edu.cn  
44

45 Peking University Clinical Research Institute, Peking University Health Science Center,  
46  
47 No. 38 Xueyuan Road, Haidian District, 100191, Beijing, China.  
48  
49

50  
51 **Word count:** 2889  
52  
53  
54  
55  
56  
57  
58  
59  
60

## ABSTRACT

**Objectives:** to describe the pre- and –in hospital delays to care and factors associated with the delays among ST-segment Elevation Myocardial Infarction (STEMI) patients in non-PCI hospitals in China.

**Design, setting and participants:** We analyzed data from a large registry-based quality of care improvement trial conducted in 2011 to 2014 among 101 non-PCI hospitals in China. A total of 7,312 STEMI patients were included. Pre-hospital delay was defined as time from onset to door  $\geq 120$  minutes, first ECG delay as door-to-ECG  $\geq 10$  minutes and thrombolytic therapy delay as ECG-to-thrombolytic therapy  $\geq 10$  minutes. Generalized linear models were preformed to identify the factors associated with each delay.

**Results:** The rates of pre-hospital delay, first ECG delay and thrombolytic therapy delay were 67.1%, 31.4% and 85.8%. Patients who were female, older than 65 years old, illiterate, farmer, onset during late night and forenoon, had heart rate  $\geq 100$  beats/m at admission were more likely and patients who had history of myocardial infarction, hypertension, or SBP  $< 90$  mmHg at admission less likely to have pre-hospital delay. First ECG delay was more likely to take place in patients arriving on regular hours. Thrombolytic therapy delay was lower in patients who had pre-hospital delay or first ECG delay but higher in those heart rate  $\geq 100$  beats/m at admission.

**Conclusion:** Chinese STEMI patients in low medical resource areas suffered severe pre- and in-hospital delays to care. Future efforts should be made to improve the pre-hospital delay among vulnerable population with low social economic status.

**Keywords:** myocardial infarction; delays; associated factors

### **Strengths and limitations of this study**

- This study provides the insights into the pre- and in-hospital delays to care among STEMI patients in low medical resource areas with a large sample from 101 non-PCI hospitals across China.
- The study used prospective data to investigate influencing factors of first ECG delay and thrombolytic therapy delay in STEMI patients.
- We could not exclude the influence of patient's recall bias for symptom onset time. However, data were collected during patient's admission within a very narrow time after STEMI onset.
- Survivor bias might exist as patients who were dead on arrival or within 10 min of hospital arrival were excluded.
- We did not collect the onset symptoms and hence could hardly study on the possible associations between the symptoms and the delays to care.

## INTRODUCTION

Total ischemic time (from symptom onset to effective reperfusion strategy) is an important indicator to the prognosis of patients with ST-segment Elevation Myocardial Infarction (STEMI).<sup>1,2</sup> In general, the total ischemic time comprises three consecutive segments. The time from symptoms onset to the door of hospital represents the time patients spend to respond to the disease onset and seeking medical care. The time from door to having the first ECG in hospital represents the time hospital staffs' responses to the patient's call for help, and with the first ECG done in time the diagnosis of STEMI could be made and appropriate treatments could be initiated. The time from diagnosis to treatment represents doctors' responses to the diagnosis of disease. Delay in each segment can lead to a longer ischemic time, which has been found associated with higher short-term as well as medium-term to long-term mortality in previous studies.<sup>3-6</sup>

Meanwhile, recent studies indicated that time delays to care among STEMI patients exist universally, showing a worse situation in low and middle income countries than that of high income countries,<sup>7-10</sup> such as 28.7% of ACS patients in Germany but two thirds of STEMI patients in Brazil suffered first ECG delay.<sup>8,9</sup> The delays to care in STEMI patients remain as great challenges to be overcome across all countries.

Up to the present, quite a few studies have tried to better understand the reasons behind these delays and showed that sociodemographic factors (female gender, older age, low educational level), medical histories (diabetes, myocardial infarction), ambiguous heart symptoms, use of private transport were related to longer delay in at least one of the three kinds of time delays.<sup>8,11-14</sup> Based on these findings, some national or regional programs

1  
2  
3  
4 have been initiated to reduce the delays by targeting at controlling these factors, through  
5  
6 educational campaign, implementation of pre-hospital ECG, establishing regional  
7  
8 collaborative network, etc. and these actions turned out to be effective.<sup>15-18</sup>  
9

10  
11 However, almost all of those studies focused on pre-hospital delay and the patients who  
12  
13 had access to onsite primary percutaneous coronary intervention (PCI) procedure. Those  
14  
15 evidences have limited value for non-PCI hospitals in remote areas where fibrinolysis is  
16  
17 the main reperfusion option for STEMI patients. As effectiveness of thrombolytic therapy  
18  
19 is more time-dependent than PCI, it is of great importance to investigate delays in those  
20  
21 settings. Therefore, the aims of the present study are (a) to describe the time delays among  
22  
23 STEMI patients in non-PCI hospitals in China, (b) to identify factors associated to these  
24  
25 delays, and (c) to make suggestions for reducing these delays and improving care of  
26  
27 STEMI patients in the similar settings in China and other countries.  
28  
29  
30  
31  
32  
33  
34  
35

## 36 **METHODS**

### 37 **Study population**

38  
39 We used data of the STEMI patients from a very large registry-based quality of care  
40  
41 improvement trial, the third phase of the Clinical Pathways for Acute Coronary Syndromes  
42  
43 (CPACS-3) in China.<sup>19</sup> In brief, patients in CPACS-3 trial were recruited consecutively  
44  
45 from 101 regional hospitals without the capacity to perform onsite PCI between Oct. 2011  
46  
47 and Nov. 2014. Patients were all over 18 years old and with a final diagnosis of ACS at  
48  
49 discharge or death. The patients who were dead on arrival or within 10 min after hospital  
50  
51 arrival were excluded. For the present study, we further excluded patients whose data of  
52  
53  
54  
55  
56  
57  
58  
59  
60

1  
2  
3  
4 time at either symptoms onset, arrival to hospital, having the first ECG or receiving  
5  
6 thrombolytic therapy were missing. From a total 10,294 STEMI patients recruited in  
7  
8 CPACS-3 trial, we had 7,312 patients analyzed with complete data. The study flow  
9  
10 diagram was shown in Figure 1.  
11  
12

13  
14 The Peking University IRB reviewed and approved the CPACS-3 trial and all participating  
15  
16 patients provided written informed consents. The CPACS-3 study registered on  
17  
18 www.clinicaltrials.gov (NCT01398228).  
19  
20

### 21 22 **Data collection and verification**

23  
24 A trained hospital staff member, who was not involved in the management of patients with  
25  
26 ACS, was responsible for collecting and entering data into a dedicated web-based Data  
27  
28 Management System (DMS). Data of each patient was collected from medical records.  
29  
30 The data included socio-demographic information, vital signs relating to the presenting  
31  
32 ACS, medical history, ECG, biomarker findings, investigations performed, treatments  
33  
34 administered prior to admission, during hospitalization, and at death or hospital discharge,  
35  
36 final diagnosis and discharge status, major in-hospital clinical events, personal insurance  
37  
38 status and the total cost of hospitalization. Data quality was maintained through  
39  
40 independent centrally managed in-person and on-line study monitoring activities.  
41  
42  
43  
44  
45  
46  
47

### 48 49 **Definitions and outcomes**

50  
51 Pre-hospital delay was defined as the time from symptoms onset to arrival to the door of  
52  
53 hospital (onset-to door time)  $\geq$  120 minutes.<sup>14 20 21</sup> Most of hospitals without PCI facility  
54  
55 in China are located in rural area, where pre-hospital emergency system is either not  
56  
57 existing or pretty weak. The ambulances serve only as a transportation vehicle but no ECG  
58  
59  
60



1  
2  
3  
4 equipped or the results not able to be transmitted back to the hospital. Thrombolytic  
5  
6 therapy remains an in-hospital practice throughout the whole country up to now. Thus, the  
7  
8 first ECG delay was defined as the time from patient's arrival to the door of hospital to the  
9  
10 time the patient had the first ECG done (door-to-ECG time)  $\geq 10$  minutes.<sup>22 23</sup> The  
11  
12 diagnosis of STEMI should had been made by then. The thrombolytic therapy delay was  
13  
14 defined as the time from patient had the first ECG done to the time the thrombolytic  
15  
16 therapy initiated (door-to-needle time)  $\geq 10$  minutes.<sup>22</sup>

### 21 22 **Statistical analysis**

23  
24 The baseline characteristics of our study patients were described as percentages for  
25  
26 categorical variables and means with standard deviations (SDs) for continuous variables  
27  
28 with a normal distribution or medians with interquartile ranges (IQRs) for continuous  
29  
30 variables with skewed distribution. The generalized estimating equations (GEE) were used  
31  
32 to test the associates of the time delays (pre-hospital delay, first ECG delay, thrombolytic  
33  
34 therapy delay), with an exchangeable correlation structure to account for clustering effect  
35  
36 (the correlation within hospitals). Missing data of covariates (all categorical variables)  
37  
38 were handled as separated groups in multivariate analyses. We used SAS 9.4 (SAS  
39  
40 Institute Inc., Cary, NC, USA) to perform data analyses. The significant level  $\alpha$  was set at  
41  
42 0.05.  
43  
44  
45  
46  
47  
48  
49

### 50 51 **RESULTS**

52  
53 The characteristics of our included patients were summarized in Table 1. Their ages ranged  
54  
55 from 19 to 102 years old and had a mean age of 63.4 years old. Most patients were males  
56  
57  
58  
59  
60

(71.2%), more than half were farmers (67.2%), and almost all covered by medical insurances (94.1%). Almost a third of them were illiterate. The vital signs, cardiovascular risk factors and history of cardiovascular diseases were shown in Table 1.

Table 1. Characteristics of included patients

| Characteristics                | All STEMI patients (N=7312)* |
|--------------------------------|------------------------------|
| Male, No. (%)                  | 5205 (71.2)                  |
| Age, Mean (SD), year           | 63.37 (12.42)                |
| Farmer, No. (%)                | 4715 (67.2) (n=7013)         |
| Illiteracy, No. (%)            | 1604 (27.7) (n=5799)         |
| Medical insurance, No. (%)     | 5140 (94.1) (n=5462)         |
| Cardiovascular risk factors    |                              |
| Smoking, No. (%)               | 2488 (34.7) (n=7170)         |
| Hypertension, No. (%)          | 4588 (62.8)                  |
| Dyslipidemia, No. (%)          | 279 (3.8)                    |
| Diabetes, No. (%)              | 851 (11.6)                   |
| Cardiovascular disease history |                              |
| Myocardial infarction, No. (%) | 460 (6.3)                    |
| Angina, No. (%)                | 805 (11.0)                   |
| Stroke, No. (%)                | 635 (8.7)                    |
| TIA, No. (%)                   | 111 (1.5)                    |
| Heart failure, No. (%)         | 160 (2.2)                    |
| Symptom onset time             |                              |

|                                     |                     |
|-------------------------------------|---------------------|
| 00:00-05:59, No. (%)                | 1315 (18.0)         |
| 06:00-11:59, No. (%)                | 2681 (36.7)         |
| 12:00-17:59, No. (%)                | 1896 (25.9)         |
| 18:00-23:59, No. (%)                | 1420 (19.4)         |
| Vital signs at admission            |                     |
| SBP < 90mmHg, No. (%)               | 407 (5.6) (n=7252)  |
| Heart rates $\geq$ 100 b/m, No. (%) | 832 (11.6) (n=7192) |

STEMI, ST-segment elevation myocardial infarction; SD, standard deviation; TIA, transient ischemic attack; SBP, systolic blood pressure.

\* Total number are shown for variable for which data were not completely reported.

### The delays to care

For all STEMI patients, 67% had experienced the pre-hospital delay and 31% experienced the first ECG delay. The patients receiving thrombolytic therapy had significantly less pre-hospital and first ECG delays, comparing with patients not receiving the therapy. Among the patients receiving thrombolytic therapy, 86% initiated the treatment after 10 minutes of the first ECG done.

No matter patients received or not thrombolytic therapy, onset-to-door time was the dominant time segment, accounting for two thirds of the total ischemic time among those who received thrombolytic therapy. Patients who did not received thrombolytic therapy suffered more than twice longer onset-to-door time as their counterparts who received thrombolytic therapy. (See Table 2)

Table 2. Time duration and delay in different segments from onset to care among STEMI

| patients (min)                          | Onset-to-door<br>time | Door-to-ECG<br>time | ECG-to-<br>Needle time | Total       |
|-----------------------------------------|-----------------------|---------------------|------------------------|-------------|
| All STEMI patients                      |                       |                     |                        |             |
| Time duration,                          | 210                   | 5                   | -                      | 260         |
| median (IQR)                            | (110-660)             | (0-17)              | -                      | (145-710)*  |
| Delay, % (No. of<br>Participants/Total) | 67.1<br>(4903/7312)   | 31.4<br>(2299/7312) | -                      | -           |
| Patients with thrombolytic therapy      |                       |                     |                        |             |
| Time duration,                          | 140 (70-240)          | 4 (0-10)            | 38 (20-65)             | 210         |
| median (IQR)                            |                       |                     |                        | (135-320)   |
| Delay, % (No. of<br>Participants/Total) | 54.6<br>(1669/3057)   | 23.6<br>(722/3057)  | 85.8<br>(2623/3057)    |             |
| Patients with non-thrombolytic therapy  |                       |                     |                        |             |
| Time duration,                          | 360 (130-             | 6 (0-24)            | -                      | 395         |
| median (IQR)                            | 1364)                 |                     |                        | (157-1419)† |
| Delay, % (No. of<br>Participants/Total) | 76.0<br>(3234/4255)   | 37.1<br>(1577/4255) | -                      |             |

STEMI, ST-segment elevation myocardial infarction; ECG, Electrocardiograph; IQR, inter quartile range.

\*, representing onset-to-needle time among those received thrombolytic therapy but onset-to-ECG time among those not;

†, representing onset-to-ECG time;

### Factors associated with the delays

A number of patient-level factors were associated with pre-hospital delay. The patients who were female, older than 65 years, illiterate, farmers, symptom onset during 00:00-05:59 and 06:00-11:59, with a faster heart rate were more likely to experience a pre-hospital delay. While, patients who had a history of myocardial infarction or hypertension, with a cardiac shock at presentation were less likely to experience a pre-hospital delay. (See Table 3)

Few patient level factors were found associated with the first ECG delay and thrombolytic therapy delay. Only patients who arrived on regular hours independently associated with higher first ECG delay rate. The first ECG delay was decreasing during the study period. (See Table 3)

Thrombolytic therapy delay was less likely to take place among patients who experienced pre-hospital delay or first ECG delay. Patients who presented with faster heart rate were more likely to experience a delay in thrombolytic therapy. (See Table 3)

Table 3. Multivariate analyses of factors associated with pre-hospital delay, first ECG delay and thrombolytic therapy delay, using generalized estimating equations.

|        | Pre-hospital<br>delay (N=7312) | First ECG delay<br>(N=7312) | Thrombolytic<br>therapy delay<br>(N=3057) |
|--------|--------------------------------|-----------------------------|-------------------------------------------|
|        | OR (95% CI)                    | OR (95% CI)                 | OR (95% CI)                               |
| Female | 1.20(1.05-1.38)                | 1.03(0.90-1.18)             | 1.07(0.80-1.43)                           |

|                              |                 |                 |                 |
|------------------------------|-----------------|-----------------|-----------------|
| ≥65 years old                | 1.54(1.37-1.73) | 1.04(0.92-1.18) | 0.97(0.77-1.23) |
| Illiteracy                   | 1.44(1.17-1.77) | 1.12(0.92-1.35) | 0.86(0.59-1.25) |
| Farmer                       | 1.61(1.36-1.90) | 1.02(0.85-1.23) | 1.21(0.90-1.63) |
| Medical insurance            | 1.14(0.73-1.79) | 1.21(0.88-1.67) | 0.69(0.32-1.45) |
| Smoking                      | 1.00(0.86-1.15) | 0.90(0.74-1.09) | 1.07(0.81-1.42) |
| History of disease, %        |                 |                 |                 |
| Myocardial infarction        | 0.67(0.52-0.87) | 1.20(0.94-1.53) | 1.16(0.70-1.92) |
| Angina                       | 0.91(0.78-1.06) | 0.82(0.67-1.00) | 0.84(0.60-1.17) |
| Stroke                       | 1.19(0.99-1.42) | 0.92(0.74-1.14) | 1.30(0.83-2.03) |
| Heart failure                | 1.25(0.84-1.88) | 0.95(0.64-1.41) | 0.74(0.24-2.25) |
| TIA                          | 0.68(0.45-1.05) | 1.01(0.56-1.82) | 1.06(0.46-2.42) |
| Diabetes                     | 0.98(0.85-1.13) | 1.00(0.84-1.18) | 1.19(0.86-1.64) |
| Hypertension                 | 0.89(0.79-0.99) | 1.01(0.90-1.14) | 1.03(0.83-1.29) |
| Dyslipidemia                 | 1.04(0.80-1.35) | 1.03(0.74-1.43) | 0.68(0.40-1.15) |
| Time cycles (every 6 months) | 0.97(0.91-1.05) | 0.87(0.76-0.99) | 1.01(0.87-1.17) |
| Symptom onset time           |                 |                 |                 |
| 00:00-05:59                  | 2.04(1.80-2.32) | -               | -               |
| 06:00-11:59                  | 1.47(1.28-1.68) | -               | -               |
| 12:00-17:59                  | ref             | -               | -               |

|                                   |                 |                 |                 |
|-----------------------------------|-----------------|-----------------|-----------------|
| 18:00-23:59                       | 1.00(0.89-1.13) | -               | -               |
| Vital signs at admission          |                 |                 |                 |
| SBP < 90 mmHg                     | 0.57(0.46-0.71) | 0.78(0.59-1.04) | 0.85(0.56-1.28) |
| Heart rates $\geq$ 100<br>beats/m | 1.71(1.48-1.99) | 1.05(0.90-1.23) | 1.61(1.04-2.50) |
| Arrived on regular<br>hours       | -               | 1.12(1.00-1.25) | 0.94(0.77-1.15) |
| Pre-hospital delay                | -               | 1.14(0.99-1.32) | 0.78(0.64-0.95) |
| First ECG delay                   | -               | -               | 0.56(0.41-0.78) |
| CPACS-3<br>intervention*          | 1.08(0.86-1.36) | 0.78(0.51-1.18) | 1.03(0.65-1.63) |

ECG, electrocardiograph; OR, odds ratio; TIA, transient ischemic attack; SBP, systolic blood pressure.

\*, the intervention of the third phase of the Clinical Pathways for Acute Coronary Syndromes study.

#### **Association of receiving thrombolytic therapy with pre-hospital delay and first ECG delay**

Patients who suffered pre-hospital delay or first ECG delay were less likely to receive thrombolytic therapy at hospital. Even further adjusted for potential confounders, pre-hospital delay and first ECG delay separately linked to 32% and 28% reductions of receiving thrombolytic therapy among our patients. (See Table 4)

Table 4. Association of receiving thrombolytic therapy with pre-hospital delay and first ECG delay

| Thrombolytic therapy |                     |                 |                 |
|----------------------|---------------------|-----------------|-----------------|
|                      | rate (%)            | Crude RR*       | Adjusted RR†    |
|                      | (No. of             | (95% CI)        | (95% CI)        |
|                      | Participants/Total) |                 |                 |
| Pre-hospital delay   |                     |                 |                 |
| Yes                  | 34.0 (1669/4903)    | 0.62(0.58-0.67) | 0.68(0.64-0.73) |
| No                   | 57.6 (1388/2409)    |                 |                 |
| First ECG delay      |                     |                 |                 |
| Yes                  | 31.4 (722/2299)     | 0.71(0.66-0.76) | 0.72(0.66-0.78) |
| No                   | 46.6 (2335/5013)    |                 |                 |

ECG, electrocardiograph; RR, risk ratio.

\*, crude RR calculated from model only included pre-hospital delay and first ECG delay;

†, further adjusted for sex, age, education level, occupation, medical insurance, smoking, histories of myocardial infarction, angina, stroke, heart failure, transient ischemic attack, diabetes, hypertension, dyslipidemia, time cycles (every 6 months), vital signs at admission, arrived on regular hours, CPACS-3 intervention.

## DISCUSSION

### Main results

In the present study, we found that two thirds of STEMI patients in non-PCI hospitals in China had the pre-hospital delay after their disease onsets in their seeking for medical care; and about one third of them had their first ECG delayed after they arrived at hospitals,



1  
2  
3  
4 according to the criteria from ESC and ACC/AHA guidelines or previous researches.<sup>14 20</sup>

5  
6  
7 <sup>21</sup> Among patients who received their thrombolytic therapy as high as 86% of them  
8  
9 received the treatment after 10 minutes of the disease diagnosis.

10  
11 Compared with STEMI patients from large medical centers in metropolitan areas of  
12  
13 China<sup>14</sup> and other developed countries<sup>13 24</sup>, where the median onset-to-door time was about  
14  
15 113 to 150 minutes, the median time found in our study was much longer, about 210  
16  
17 minutes. But our results were similar to that was reported in the Middle East<sup>10</sup> and shorter  
18  
19 than that in India<sup>25</sup>. The first ECG delay in our study was much better than that in Brazil  
20  
21 (67%)<sup>8</sup> and India (55%)<sup>7</sup> but worse than that in developed countries like Japan (18.4%)<sup>26</sup>  
22  
23 and Germany (28.7%)<sup>9</sup>. As previous studies including ours have demonstrated the  
24  
25 significant association of ischemic time with the short and long term mortality among  
26  
27 patients with STEMI, our findings in this study highlighted the urgent needs to reduce the  
28  
29 delays to care for STEMI patients in the similar settings in China and other developing  
30  
31 countries.  
32  
33  
34  
35  
36  
37  
38  
39

40 Our further analyses showed that the pre-hospital and first ECG delays were significantly  
41  
42 associated with the risk of not receiving thrombolytic therapy. In fact, only 43% of our  
43  
44 study patients received thrombolytic therapy. Since these patients admitted to non-PCI  
45  
46 hospitals of China often lived far away from large tertiary medical centers equipped with  
47  
48 PCI facilities, thrombolytic therapy was the only revascularization treatment they could  
49  
50 have in the first line. Reducing the pre-hospital and first ECG delay should have great  
51  
52 potential to permit more patients with thrombolytic therapy, which in turn will save many  
53  
54 more lives in these remote areas. In our study, half of the patients not receiving  
55  
56  
57  
58  
59  
60

1  
2  
3  
4 thrombolytic therapy arrived at hospital beyond 6 hours after their disease onsets and hence  
5  
6 lost the best opportunity to receive the treatment. If the median time could be reduced to 3  
7  
8 hours, probably the most of these patients would still have chance for the thrombolytic  
9  
10 therapy.  
11  
12

13  
14 The study on the factors associated with the delays to care could help to find solutions to  
15  
16 reduce the delays. Like previous studies, the onset-to-door time took the most part of the  
17  
18 total ischemic time, and we should pay more attention to reduce the pre-hospital delay. In  
19  
20 our study, patients who were female, older than 75 years old, illiterate, and farmer were  
21  
22 found more likely to have the pre-hospital delay. This implies that efforts should be made  
23  
24 to improve the medical access for the vulnerable patients with low social economic status.  
25  
26  
27

28  
29 A recent study among Indian STEMI patients supports our findings and found that the  
30  
31 difficulty of arranging money was an important factor leading to the pre-hospital delay.<sup>7</sup>  
32  
33 Furthermore, the elderly and illiterate patients might misinterpret the symptoms of STEMI  
34  
35 with symptoms of ageing, aggravating their pre-hospital delays.<sup>21</sup>  
36  
37

38  
39 Patients with history of myocardial infarction, hypertension, or presented with shock at  
40  
41 admission were found less likely to have the pre-hospital delay. We believe this is because  
42  
43 these patients had more knowledge of myocardial infarction and realized the importance  
44  
45 of in-time medical rescue. We believe the reason for patients who presented with shock at  
46  
47 admission were found less likely to have pre-hospital delay was due to the severity of the  
48  
49 symptom, which alarmed the patient itself, family members or a companion person that  
50  
51 helped to access medical care in time. In contrast, we believe the reason for patients who  
52  
53 presented with tachycardia at admission more likely to have pre-hospital delay was  
54  
55  
56  
57  
58  
59  
60

1  
2  
3  
4 actually an inverse causal relationship, i.e. the tachycardia was a result of pre-hospital  
5  
6 delay.

7  
8  
9 Similar to previous studies,<sup>7 13 14 27</sup> we also found patients suffered pre-hospital delay had  
10  
11 their symptom onset most during 00:00 to 05:59. Most people are in sleep during this time,  
12  
13 and most patients would not want to bother others at this time if they believe the disease  
14  
15 was not severe. Those patients might be prone to going to the hospital the next day avoiding  
16  
17 troublesome visits at late night. The phenomenon might be exaggerated by the fact that the  
18  
19 most of our study patients were living in rural areas. The barriers for patients living in rural  
20  
21 areas seeking for medical service include long distance, poor transport facilities and costs  
22  
23 concerns. The evidence that patients who had shorter onset-to-door time were with less  
24  
25 stroke or heart failure history supported this explanation to some extent.  
26  
27  
28  
29  
30

31  
32 As the first ECG delay reflects more medical staff rather than patients' responses to the  
33  
34 disease, no patient side factor was found associated with the first ECG delay in our study.  
35  
36 But first ECG delay was found more likely to take place in patients arriving on regular  
37  
38 hours. The same results were also found among NSTEMI-ACS patients in CRUSADE  
39  
40 Quality Improvement Initiative study.<sup>28</sup> Although the reasons are still unknown, this  
41  
42 relationship may reflect the insufficiency of medical staff and the consequential long  
43  
44 waiting time in regular hours.  
45  
46  
47  
48  
49

50  
51 Recent STREAM trial demonstrated that thrombolytic therapy (median time from  
52  
53 randomization to bolus recorded was 9 min) was as effective as primary PCI beyond 1  
54  
55 hour among STEMI patients who presented within 3 hours after symptom onset.<sup>29</sup> Based  
56  
57 on the results from the STREAM trial, European Society of Cardiology recommended time  
58  
59  
60

1  
2  
3  
4 from STEMI diagnosis to the start of fibrinolysis to be within 10 min.<sup>22</sup> According to the  
5  
6 new ESC guidelines, only 14% of patients who received fibrinolysis achieved the 10 min  
7  
8 target. We consider this target time may be ideal but quite unrealistic in rural China now,  
9  
10 considering there are many barriers that prevent from initiating the thrombolytic therapy  
11  
12 in such a short time. Particularly, the new type of fibrinolytic agents (Tenecteplase), which  
13  
14 was used in the STREAM trial, is not available yet in China. Hopefully, the ECG-to-needle  
15  
16 time can be shortened as the recombinant human TNK tissue-type plasminogen activator  
17  
18 (rhTNKtPA) has been approved by China FDA recently, which is applied in bolus at once  
19  
20 and easy for administration. Meanwhile, due to the possible severe bleedings, the patient  
21  
22 inform consent often takes a long time, particularly when the doctor-patient relationship is  
23  
24 not good and the medical insurance could not cover the entire costs. However, even with  
25  
26 the old criteria that door-to-needle time should be within 30 minutes,<sup>23</sup> there were still 68%  
27  
28 STEMI patients in present study started their thrombolytic therapy beyond this criterion.  
29  
30 Door-to-needle delays were also reported severe in other similar settings like India (87%)<sup>7</sup>  
31  
32 and rural Canada (42%)<sup>30</sup> according to the old criteria.

33  
34  
35  
36  
37  
38  
39  
40  
41  
42  
43 One of the interesting findings from our study was that among patients receiving  
44  
45 thrombolytic therapy, the treatment delay was lower in patients who had pre-hospital delay  
46  
47 or first ECG delay, reflecting medical team's "time catch-up" effort after the patient was  
48  
49 confirmed STEMI diagnosis by ECG examination. Physicians were apt to react more  
50  
51 rapidly to make up previous delays, as the effects of the treatment are time-dependent,  
52  
53 especially for thrombolytic therapy. Nevertheless, we should understand that physicians'  
54  
55 "catch-up effect" only had limited value for shortening total ischemic time, as the major  
56  
57  
58  
59  
60

1  
2  
3  
4 segment was the onset-to-door time. More emphases should be put onto reducing the pre-  
5  
6 hospital delay.  
7

### 8 9 **Strengths and limitations**

10  
11 The strengths of our study include: 1) A large sample from non-PCI hospitals across China.  
12  
13 The results could be extended to other places of China and the world with the similar  
14  
15 settings. 2) The data were collected prospectively, under strict supervision by an  
16  
17 experienced project management team and a steering committee composed of international  
18  
19 expertise in cardiology, epidemiology and biostatistics.  
20  
21  
22  
23

24  
25 The present study also has several limitations. First, we could not exclude the influence of  
26  
27 patient's recall bias for symptom onset time. However, data were collected during patient's  
28  
29 admission within a very narrow time after their symptom onset. Another limitation is that  
30  
31 survivor bias might exist as patients who were dead on arrival or within 10 min of hospital  
32  
33 arrival were excluded. Additionally, we did not collect the onset symptoms and hence  
34  
35 could hardly study on the possible associations between the symptoms and the delays to  
36  
37 care.  
38  
39  
40  
41

### 42 43 **CONCLUSIONS**

44  
45 In conclusion, the present study demonstrated that STEMI patients in non-PCI hospitals in  
46  
47 China suffered severe time delays to care. Among the three types of delay, pre-hospital  
48  
49 delay should be emphasized although the other two still have rooms for improvement.  
50  
51 Future efforts should be made to improve the pre-hospital delay among vulnerable  
52  
53 populations with low social economic status.  
54  
55  
56

### 57 58 **Implication**

1  
2  
3  
4 Establishment of pre-hospital rescue system facilitated with ECG examination and results  
5  
6 transmission equipment as well as population-wide health education of in-time seeking  
7  
8 medical care and chest pain might offer solutions to improve the current clinical practice  
9  
10 and enhance the quality of care among STEMI patients.  
11  
12  
13  
14  
15  
16  
17  
18  
19  
20  
21  
22  
23  
24  
25  
26  
27  
28  
29  
30  
31  
32  
33  
34  
35  
36  
37  
38  
39  
40  
41  
42  
43  
44  
45  
46  
47  
48  
49  
50  
51  
52  
53  
54  
55  
56  
57  
58  
59  
60

For peer review only

### Author contributions

LF, ML and YW conceived this study. YW obtained research funding. LF conceived and conducted statistical analyses. WX and XL provided statistical advice and statistical validation. AZ supervised the conduct of the study and data collection. LF, ML, LL, WX and YW interpreted the results. LF drafted the manuscript and all authors contributed substantially to its revision. YW takes responsibility for the paper as a whole.

### Acknowledgements

The CPACS-3 Study Steering Committee (sorted by the first letter of the family name):

Kalipso Chalkidou (National Institute for Health and Clinical Excellence), Runlin Gao\* (Cardiovascular Institute and Fuwai Hospital), Dayi Hu (Peking University People's Hospital), Yong Huo (Peking University First Hospital), Yahui Jiao (NHFPC of China), Lingzhi Kong (NHFPC of China), Anushka Patel (The George Institute for Global Health), Eric Peterson (Duke Clinical Research Institute), Fiona Turnbull (The George Institute for Global Health), Mark Woodward (The George Institute for Global Health), Yangfeng Wu\* (The George Institute for Global Health at PUHSC ).

\*Co-principal investigators.

### Funding

CPACS-3 study is an investigator sponsored study supported by Sanofi. The George Institute for Global Health at PUHSC sponsored the study and owns the data. However, the authors are solely responsible for the design and conduct of this study, all study analyses, the drafting and editing of the manuscript, and its final contents.

## Conflict of interest

None declared.

## REFERENCES

1. Solhpour A, Chang KW, Arain SA, et al. Ischemic time is a better predictor than door-to-balloon time for mortality and infarct size in ST-elevation myocardial infarction. *Catheterization and cardiovascular interventions : official journal of the Society for Cardiac Angiography & Interventions* 2016;87(7):1194-200. doi: 10.1002/ccd.26230 [published Online First: 2015/09/04]
2. Chughtai H, Ratner D, Pozo M, et al. Prehospital delay and its impact on time to treatment in ST-elevation myocardial infarction. *The American journal of emergency medicine* 2011;29(4):396-400. doi: 10.1016/j.ajem.2009.11.006 [published Online First: 2010/09/10]
3. Nallamothu B, Fox KA, Kennelly BM, et al. Relationship of treatment delays and mortality in patients undergoing fibrinolysis and primary percutaneous coronary intervention. The Global Registry of Acute Coronary Events. *Heart (British Cardiac Society)* 2007;93(12):1552-5. doi: 10.1136/hrt.2006.112847 [published Online First: 2007/06/27]
4. Berger PB, Ellis SG, Holmes DR, Jr., et al. Relationship between delay in performing direct coronary angioplasty and early clinical outcome in patients with acute myocardial infarction: results from the global use of strategies to open occluded arteries in Acute Coronary Syndromes (GUSTO-IIb) trial. *Circulation* 1999;100(1):14-20. [published Online First: 1999/07/07]
5. Foo CY, Bonsu KO, Nallamothu BK, et al. Coronary intervention door-to-balloon time and outcomes in ST-elevation myocardial infarction: a meta-analysis. *Heart (British Cardiac Society)*



- 1  
2  
3  
4 2018;104(16):1362-69. doi: 10.1136/heartjnl-2017-312517 [published Online First: 2018/02/14]  
5  
6  
7 6. Benamer H, Bataille S, Tafflet M, et al. Longer pre-hospital delays and higher mortality in women  
8  
9 with STEMI: the e-MUST Registry. *EuroIntervention : journal of EuroPCR in collaboration with*  
10  
11 *the Working Group on Interventional Cardiology of the European Society of Cardiology*  
12  
13 2016;12(5):e542-9. doi: 10.4244/eijv12i5a93 [published Online First: 2016/08/09]  
14  
15  
16  
17 7. George L, Ramamoorthy L, Satheesh S, et al. Prehospital delay and time to reperfusion therapy in  
18  
19 ST elevation myocardial infarction. *Journal of emergencies, trauma, and shock* 2017;10(2):64-  
20  
21 69. doi: 10.4103/0974-2700.201580 [published Online First: 2017/04/04]  
22  
23  
24  
25 8. Duraes AR, Bitar YS, Freitas ACT, et al. Gender differences in ST-elevation myocardial infarction  
26  
27 (STEMI) time delays: experience of a public health service in Salvador-Brazil. *American journal*  
28  
29 *of cardiovascular disease* 2017;7(5):102-07. [published Online First: 2017/11/29]  
30  
31  
32  
33 9. Post F, Giannitsis E, Riemer T, et al. Pre- and early in-hospital procedures in patients with acute  
34  
35 coronary syndromes: first results of the "German chest pain unit registry". *Clinical research in*  
36  
37 *cardiology : official journal of the German Cardiac Society* 2012;101(12):983-91. doi:  
38  
39 10.1007/s00392-012-0487-4 [published Online First: 2012/07/26]  
40  
41  
42  
43 10. Shehab A, AlHabib KF, Bhagavathula AS, et al. Clinical presentation, Quality of care, Risk factors  
44  
45 and Outcomes in Women with Acute ST-Elevation Myocardial Infarction (STEMI): An  
46  
47 Observational Report from Six Middle Eastern Countries. *Current vascular pharmacology*  
48  
49 2018;16:000-00. doi: 10.2174/1570161116666180315104820 [published Online First:  
50  
51 2018/03/16]  
52  
53  
54  
55  
56 11. Sullivan AL, Beshansky JR, Ruthazer R, et al. Factors associated with longer time to treatment for  
57  
58 patients with suspected acute coronary syndromes: a cohort study. *Circulation Cardiovascular*  
59  
60

- 1  
2  
3  
4 *quality and outcomes* 2014;7(1):86-94. doi: 10.1161/circoutcomes.113.000396 [published  
5  
6  
7 Online First: 2014/01/16]  
8
- 9 12. McKinley S, Dracup K, Moser DK, et al. International comparison of factors associated with delay  
10  
11 in presentation for AMI treatment. *Eur J Cardiovasc Nurs* 2004;3(3):225-30. doi:  
12  
13 10.1016/j.ejcnurse.2004.06.004 [published Online First: 2004/09/08]  
14  
15  
16
- 17 13. Park YH, Kang GH, Song BG, et al. Factors related to prehospital time delay in acute ST-segment  
18  
19 elevation myocardial infarction. *Journal of Korean medical science* 2012;27(8):864-9. doi:  
20  
21 10.3346/jkms.2012.27.8.864 [published Online First: 2012/08/10]  
22  
23  
24
- 25 14. Peng YG, Feng JJ, Guo LF, et al. Factors associated with prehospital delay in patients with ST-  
26  
27 segment elevation acute myocardial infarction in China. *The American journal of emergency*  
28  
29 *medicine* 2014;32(4):349-55. doi: 10.1016/j.ajem.2013.12.053 [published Online First:  
30  
31 2014/02/12]  
32  
33  
34
- 35 15. Naegeli B, Radovanovic D, Rickli H, et al. Impact of a nationwide public campaign on delays and  
36  
37 outcome in Swiss patients with acute coronary syndrome. *European journal of cardiovascular*  
38  
39 *prevention and rehabilitation : official journal of the European Society of Cardiology, Working*  
40  
41 *Groups on Epidemiology & Prevention and Cardiac Rehabilitation and Exercise Physiology*  
42  
43 2011;18(2):297-304. doi: 10.1177/1741826710389386 [published Online First: 2011/04/01]  
44  
45  
46  
47
- 48 16. Quinn T, Johnsen S, Gale CP, et al. Effects of prehospital 12-lead ECG on processes of care and  
49  
50 mortality in acute coronary syndrome: a linked cohort study from the Myocardial Ischaemia  
51  
52 National Audit Project. *Heart (British Cardiac Society)* 2014;100(12):944-50. doi:  
53  
54 10.1136/heartjnl-2013-304599 [published Online First: 2014/04/16]  
55  
56  
57
- 58 17. Mooney M, McKee G, Fealy G, et al. A review of interventions aimed at reducing pre-hospital delay  
59  
60

- 1  
2  
3  
4 time in acute coronary syndrome: what has worked and why? *Eur J Cardiovasc Nurs*  
5  
6 2012;11(4):445-53. doi: 10.1016/j.ejcnurse.2011.04.003 [published Online First: 2011/05/14]  
7  
8  
9 18. Duan T, Xiang D, Qin W, et al. [Impact of establishing regional collaborative network on reperfusion  
10  
11 time and prognosis of patients with ST-segment elevated myocardial infarction admitting to  
12  
13 community hospitals without percutaneous coronary intervention capacity]. *Zhonghua xin xue*  
14  
15 *guan bing za zhi* 2014;42(8):641-5. [published Online First: 2014/11/13]  
16  
17  
18  
19 19. Wu Y, Li S, Patel A, et al. Effect of a Quality of Care Improvement Initiative in Patients With Acute  
20  
21 Coronary Syndrome in Resource-Constrained Hospitals in China: A Randomized Clinical Trial.  
22  
23 *JAMA Cardiol* 2019 doi: 10.1001/jamacardio.2019.0897 [published Online First: 2019/04/18]  
24  
25  
26  
27 20. Ladwig KH, Fang X, Wolf K, et al. Comparison of Delay Times Between Symptom Onset of an Acute  
28  
29 ST-elevation Myocardial Infarction and Hospital Arrival in Men and Women <65 Years  
30  
31 Versus ≥65 Years of Age.: Findings From the Multicenter Munich Examination of Delay in  
32  
33 Patients Experiencing Acute Myocardial Infarction (MEDEA) Study. *The American journal of*  
34  
35 *cardiology* 2017;120(12):2128-34. doi: 10.1016/j.amjcard.2017.09.005 [published Online First:  
36  
37 2017/11/11]  
38  
39  
40  
41  
42 21. Wah W, Pek PP, Ho AF, et al. Symptom-to-door delay among patients with ST-segment elevation  
43  
44 myocardial infarction in Singapore. *Emergency medicine Australasia : EMA* 2017;29(1):24-32.  
45  
46  
47  
48  
49 doi: 10.1111/1742-6723.12689 [published Online First: 2016/10/12]  
50  
51 22. Ibanez B, James S, Agewall S, et al. 2017 ESC Guidelines for the management of acute myocardial  
52  
53 infarction in patients presenting with ST-segment elevation: The Task Force for the  
54  
55 management of acute myocardial infarction in patients presenting with ST-segment elevation  
56  
57 of the European Society of Cardiology (ESC). *Eur Heart J* 2017;00:1-66. doi:  
58  
59  
60

- 1  
2  
3  
4 10.1093/eurheartj/ehx393  
5  
6  
7 23. O'Gara PT, Kushner FG, Ascheim DD, et al. 2013 ACCF/AHA guideline for the management of ST-  
8  
9 elevation myocardial infarction: a report of the American College of Cardiology  
10  
11 Foundation/American Heart Association Task Force on Practice Guidelines. *Circulation*  
12  
13 2013;127(4):e362-425. doi: 10.1161/CIR.0b013e3182742cf6  
14  
15  
16  
17 24. Fujii T, Masuda N, Suzuki T, et al. Impact of transport pathways on the time from symptom onset of  
18  
19 ST-segment elevation myocardial infarction to door of coronary intervention facility. *Journal of*  
20  
21 *cardiology* 2014;64(1):11-8. doi: 10.1016/j.jjcc.2013.11.008 [published Online First: 2014/01/09]  
22  
23  
24  
25 25. Isezuo S, Subban V, Krishnamoorthy J, et al. Characteristics, treatment and one-year outcomes of  
26  
27 patients with acute coronary syndrome in a tertiary hospital in India. *Indian heart journal*  
28  
29 2014;66(2):156-63. doi: 10.1016/j.ihj.2013.12.023 [published Online First: 2014/05/13]  
30  
31  
32  
33 26. Noguchi M, Ako J, Morimoto T, et al. Modifiable factors associated with prolonged door to balloon  
34  
35 time in patients with ST-segment elevation myocardial infarction undergoing primary  
36  
37 percutaneous coronary intervention. *Heart and vessels* 2018;33(10):1139-48. doi:  
38  
39 10.1007/s00380-018-1164-y [published Online First: 2018/05/08]  
40  
41  
42  
43 27. Goldberg RJ, Steg PG, Sadiq I, et al. Extent of, and factors associated with, delay to hospital  
44  
45 presentation in patients with acute coronary disease (the GRACE registry). *The American*  
46  
47 *journal of cardiology* 2002;89(7):791-6. [published Online First: 2002/03/23]  
48  
49  
50  
51 28. Diercks DB, Peacock WF, Hiestand BC, et al. Frequency and consequences of recording an  
52  
53 electrocardiogram >10 minutes after arrival in an emergency room in non-ST-segment  
54  
55 elevation acute coronary syndromes (from the CRUSADE Initiative). *The American journal of*  
56  
57 *cardiology* 2006;97(4):437-42. doi: 10.1016/j.amjcard.2005.09.073 [published Online First:  
58  
59  
60

1  
2  
3  
4 2006/02/08]

5  
6  
7 29. Armstrong PW, Gershlick AH, Goldstein P, et al. Fibrinolysis or primary PCI in ST-segment elevation  
8  
9 myocardial infarction. *The New England journal of medicine* 2013;368(15):1379-87. doi:  
10  
11 10.1056/NEJMoa1301092 [published Online First: 2013/03/12]

12  
13  
14 30. Vlahaki D, Fiaani M, Milne WK. A door-to-needle time of 30 minutes or less for myocardial infarction  
15  
16 thrombolysis is possible in rural emergency departments. *Cjem* 2008;10(5):429-33. [published  
17  
18 Online First: 2008/10/02]

19  
20  
21  
22  
23  
24  
25 Figure 1. Study flow diagram of included patient  
26  
27  
28  
29  
30  
31  
32  
33  
34  
35  
36  
37  
38  
39  
40  
41  
42  
43  
44  
45  
46  
47  
48  
49  
50  
51  
52  
53  
54  
55  
56  
57  
58  
59  
60

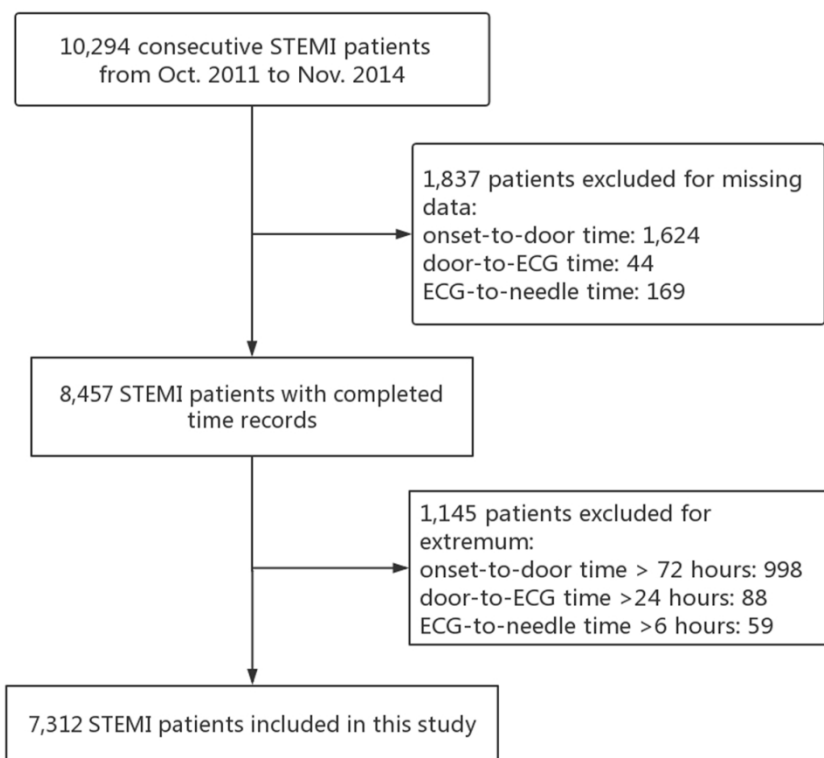

34 Figure 1. Study flow diagram of included patients.

35  
36  
37  
38 Figure 1. Study flow diagram of included patient

39  
40 351x349mm (100 x 100 DPI)

STROBE 2007 (v4) Statement—Checklist of items that should be included in reports of cross-sectional studies

| Section/Topic             | Item # | Recommendation                                                                                                                                                                       | Reported on page # |
|---------------------------|--------|--------------------------------------------------------------------------------------------------------------------------------------------------------------------------------------|--------------------|
| Title and abstract        | 1      | (a) Indicate the study’s design with a commonly used term in the title or the abstract                                                                                               | 2                  |
|                           |        | (b) Provide in the abstract an informative and balanced summary of what was done and what was found                                                                                  | 2                  |
| <b>Introduction</b>       |        |                                                                                                                                                                                      |                    |
| Background/rationale      | 2      | Explain the scientific background and rationale for the investigation being reported                                                                                                 | 4-5                |
| Objectives                | 3      | State specific objectives, including any prespecified hypotheses                                                                                                                     | 5                  |
| <b>Methods</b>            |        |                                                                                                                                                                                      |                    |
| Study design              | 4      | Present key elements of study design early in the paper                                                                                                                              | 5                  |
| Setting                   | 5      | Describe the setting, locations, and relevant dates, including periods of recruitment, exposure, follow-up, and data collection                                                      | 5-6                |
| Participants              | 6      | (a) Give the eligibility criteria, and the sources and methods of selection of participants                                                                                          | 5                  |
| Variables                 | 7      | Clearly define all outcomes, exposures, predictors, potential confounders, and effect modifiers. Give diagnostic criteria, if applicable                                             | 6-7                |
| Data sources/ measurement | 8*     | For each variable of interest, give sources of data and details of methods of assessment (measurement). Describe comparability of assessment methods if there is more than one group | 6                  |
| Bias                      | 9      | Describe any efforts to address potential sources of bias                                                                                                                            | 6                  |
| Study size                | 10     | Explain how the study size was arrived at                                                                                                                                            | NA                 |
| Quantitative variables    | 11     | Explain how quantitative variables were handled in the analyses. If applicable, describe which groupings were chosen and why                                                         | 6-7                |
| Statistical methods       | 12     | (a) Describe all statistical methods, including those used to control for confounding                                                                                                | 7                  |
|                           |        | (b) Describe any methods used to examine subgroups and interactions                                                                                                                  | NA                 |
|                           |        | (c) Explain how missing data were addressed                                                                                                                                          | 7                  |
|                           |        | (d) If applicable, describe analytical methods taking account of sampling strategy                                                                                                   | NA                 |
|                           |        | (e) Describe any sensitivity analyses                                                                                                                                                | NA                 |
| <b>Results</b>            |        |                                                                                                                                                                                      |                    |

|                          |     |                                                                                                                                                                                                              |                |
|--------------------------|-----|--------------------------------------------------------------------------------------------------------------------------------------------------------------------------------------------------------------|----------------|
| Participants             | 13* | (a) Report numbers of individuals at each stage of study—eg numbers potentially eligible, examined for eligibility, confirmed eligible, included in the study, completing follow-up, and analysed            | 6 and figure 1 |
|                          |     | (b) Give reasons for non-participation at each stage                                                                                                                                                         | figure 1       |
|                          |     | (c) Consider use of a flow diagram                                                                                                                                                                           | figure 1       |
| Descriptive data         | 14* | (a) Give characteristics of study participants (eg demographic, clinical, social) and information on exposures and potential confounders                                                                     | Table 1        |
|                          |     | (b) Indicate number of participants with missing data for each variable of interest                                                                                                                          | Table 1        |
| Outcome data             | 15* | Report numbers of outcome events or summary measures                                                                                                                                                         | 9 table 2      |
| Main results             | 16  | (a) Give unadjusted estimates and, if applicable, confounder-adjusted estimates and their precision (eg, 95% confidence interval). Make clear which confounders were adjusted for and why they were included | Table 2        |
|                          |     | (b) Report category boundaries when continuous variables were categorized                                                                                                                                    | Table 3        |
|                          |     | (c) If relevant, consider translating estimates of relative risk into absolute risk for a meaningful time period                                                                                             | NA             |
| Other analyses           | 17  | Report other analyses done—eg analyses of subgroups and interactions, and sensitivity analyses                                                                                                               | NA             |
| <b>Discussion</b>        |     |                                                                                                                                                                                                              |                |
| Key results              | 18  | Summarise key results with reference to study objectives                                                                                                                                                     | 14-15          |
| Limitations              | 19  | Discuss limitations of the study, taking into account sources of potential bias or imprecision. Discuss both direction and magnitude of any potential bias                                                   | 19             |
| Interpretation           | 20  | Give a cautious overall interpretation of results considering objectives, limitations, multiplicity of analyses, results from similar studies, and other relevant evidence                                   | 19-20          |
| Generalisability         | 21  | Discuss the generalisability (external validity) of the study results                                                                                                                                        | 19             |
| <b>Other information</b> |     |                                                                                                                                                                                                              |                |
| Funding                  | 22  | Give the source of funding and the role of the funders for the present study and, if applicable, for the original study on which the present article is based                                                | 21             |

\*Give information separately for cases and controls in case-control studies and, if applicable, for exposed and unexposed groups in cohort and cross-sectional studies.

**Note:** An Explanation and Elaboration article discusses each checklist item and gives methodological background and published examples of transparent reporting. The STROBE checklist is best used in conjunction with this article (freely available on the Web sites of PLoS Medicine at <http://www.plosmedicine.org/>, Annals of Internal Medicine at <http://www.annals.org/>, and Epidemiology at <http://www.epidem.com/>). Information on the STROBE Initiative is available at [www.strobe-statement.org](http://www.strobe-statement.org).



# BMJ Open

## Pre- and in-hospital delays to care and associated factors in STEMI patients: an observational study in 101 non-PCI hospitals in China

|                                 |                                                                                                                                                                                                                                                                                                                                                                                                                                                                                                                                                                                                                                                                                                                                                                  |
|---------------------------------|------------------------------------------------------------------------------------------------------------------------------------------------------------------------------------------------------------------------------------------------------------------------------------------------------------------------------------------------------------------------------------------------------------------------------------------------------------------------------------------------------------------------------------------------------------------------------------------------------------------------------------------------------------------------------------------------------------------------------------------------------------------|
| Journal:                        | <i>BMJ Open</i>                                                                                                                                                                                                                                                                                                                                                                                                                                                                                                                                                                                                                                                                                                                                                  |
| Manuscript ID                   | bmjopen-2019-031918.R1                                                                                                                                                                                                                                                                                                                                                                                                                                                                                                                                                                                                                                                                                                                                           |
| Article Type:                   | Original research                                                                                                                                                                                                                                                                                                                                                                                                                                                                                                                                                                                                                                                                                                                                                |
| Date Submitted by the Author:   | 23-Sep-2019                                                                                                                                                                                                                                                                                                                                                                                                                                                                                                                                                                                                                                                                                                                                                      |
| Complete List of Authors:       | Feng, Lin; Peking University First Hospital, ; Peking University Clinical Research Institute,<br>Li , Min; Peking University School of Public Health , Epidemiology and Biostatistics<br>Xie , Wuxiang ; Peking University Clinical Research Institute, Peking University Health Science Center<br>Zhang, Aihua; The George Institute for Global Health at Peking University Health Science Center<br>Lei, Licheng; Capital Medical University Affiliated Beijing Shijitan Hospital, The Department of Cardiology<br>Li , Xian; The George Institute for Global Health at Peking University Health Science Center<br>Gao, R; Fu Wai Hospital, National Center for Cardiovascular Diseases, Wu, Yangfeng; Peking University School of Public Health, Epidemiology |
| <b>Primary Subject Heading</b>: | Cardiovascular medicine                                                                                                                                                                                                                                                                                                                                                                                                                                                                                                                                                                                                                                                                                                                                          |
| Secondary Subject Heading:      | Health services research                                                                                                                                                                                                                                                                                                                                                                                                                                                                                                                                                                                                                                                                                                                                         |
| Keywords:                       | Myocardial infarction < CARDIOLOGY, delays, associated factors                                                                                                                                                                                                                                                                                                                                                                                                                                                                                                                                                                                                                                                                                                   |
|                                 |                                                                                                                                                                                                                                                                                                                                                                                                                                                                                                                                                                                                                                                                                                                                                                  |

SCHOLARONE™  
Manuscripts

1  
2  
3  
4 **Pre- and in-hospital delays to care and associated factors in STEMI patients: an**  
5  
6 **observational study in 101 non-PCI hospitals in China**  
7  
8

9 **Authors:** Lin Feng (BM)<sup>1,2</sup>, Min Li (PhD)<sup>3</sup>, Wuxiang Xie (PhD)<sup>2</sup>, Aihua Zhang (BM)<sup>4</sup>,  
10  
11 Licheng Lei (MD)<sup>5</sup>, Xian Li (MSc)<sup>4</sup>, Runlin Gao (MD)<sup>6</sup>, Yangfeng Wu (PhD)<sup>2,4</sup> \*  
12  
13

14 <sup>1</sup> Peking University First Hospital, Beijing, China;  
15

16  
17 <sup>2</sup> Peking University Clinical Research Institute, Peking University Health Science Center,  
18  
19 Beijing, China;  
20  
21

22 <sup>3</sup> Clinical Epidemiology and EBM Center, Beijing Friendship Hospital, Capital Medical  
23  
24 University, National Clinical Research Center for Digestive Disease, Beijing, China;  
25  
26

27 <sup>4</sup> The George Institute for Global Health at Peking University Health Science Center,  
28  
29 Beijing, China;  
30  
31

32 <sup>5</sup> The Department of Cardiology, Beijing Shijitan Hospital, Capital Medical University,  
33  
34 Beijing, China;  
35  
36

37 <sup>6</sup> The Department of Cardiology, Cardiovascular Institute and Fuwai Hospital, Chinese  
38  
39 Academy of Medical Sciences and Peking Union Medical College, Beijing, China;  
40  
41

42  
43 \*Corresponding Author: Yangfeng Wu, wuyf@bjmu.edu.cn  
44

45 Peking University Clinical Research Institute, Peking University Health Science Center,  
46  
47 No. 38 Xueyuan Road, Haidian District, 100191, Beijing, China.  
48  
49

50  
51 **Word count:** 3281  
52  
53  
54  
55  
56  
57  
58  
59  
60

## ABSTRACT

**Objectives:** To describe the pre- and in-hospital delays to care and factors associated with the delays among ST-segment Elevation Myocardial Infarction (STEMI) patients in non-PCI hospitals in China.

**Design, setting and participants:** We analyzed data from a large registry-based quality of care improvement trial conducted in 2011 to 2014 among 101 non-PCI hospitals in China. A total of 7,312 STEMI patients were included. Pre-hospital delay was defined as time from symptom onset to hospital arrival > 120 minutes, first ECG delay as time from arrival to first ECG > 10 minutes, thrombolytic therapy delay as time from first ECG to thrombolytic therapy > 10 minutes and in-hospital delay as time from arrival to thrombolytic therapy > 30 minutes. The logistic regressions with generalized estimating equations were performed to identify the factors associated with each delay.

**Results:** The rates of pre-hospital delay, first ECG delay, thrombolytic therapy delay and in-hospital delay were 67.1%, 31.4%, 85.8% and 67.8%. Patients who were female, older than 65 years old, illiterate, farmer, onset during late night and forenoon, had heart rate  $\geq 100$  beats/m at admission were more likely and patients who had history of myocardial infarction, hypertension, or SBP < 90 mmHg at admission were less likely to have pre-hospital delay. First ECG delay was more likely to take place in patients arriving on regular hours. Thrombolytic therapy delay rate was lower in patients who had pre-hospital delay or first ECG delay but higher in those heart rate  $\geq 100$  beats/m at admission. In-hospital delay rate was lower in patients with history of dyslipidemia and those arrived on regular hours.

1  
2  
3  
4       **Conclusion:** Chinese STEMI patients in low medical resource areas suffered severe  
5  
6 pre- and in-hospital delays to care. Future efforts should be made to improve the pre-  
7  
8 hospital delay among vulnerable population with low social economic status.  
9  
10

11       **Keywords:** myocardial infarction; delays; associated factors  
12  
13

#### 14 15 **Strengths and limitations of this study** 16

- 17  
18 ● This study provides the insights into the pre- and in-hospital delays to care among  
19  
20 STEMI patients in low medical resource areas with a large sample from 101 non-PCI  
21  
22 hospitals across China.  
23  
24
- 25  
26 ● The study used prospective data to investigate influencing factors of first ECG delay  
27  
28 and thrombolytic therapy delay in STEMI patients.  
29  
30
- 31  
32 ● We could not exclude the influence of patient's recall bias for symptom onset time.  
33  
34 However, data were collected during patient's admission within a very narrow time  
35  
36 after STEMI onset.  
37  
38
- 39  
40 ● Survivor bias might exist as patients who were dead on arrival or within 10 min of  
41  
42 hospital arrival were excluded.  
43  
44
- 45  
46 ● We did not collect the onset symptoms and hence could hardly study on the possible  
47  
48 associations between the symptoms and the delays to care.  
49  
50  
51  
52  
53  
54  
55  
56  
57  
58  
59  
60

## INTRODUCTION

Total ischemic time (time from symptom onset to thrombolytic therapy) is an important indicator to the prognosis of patients with ST-segment Elevation Myocardial Infarction (STEMI).<sup>1,2</sup> In general, the total ischemic time comprises three consecutive segments. The time from symptoms onset to the hospital arrival represents the time patients spend to respond to the disease onset and seeking medical care. The time from hospital arrival to having the first electrocardiograph (ECG) in hospital represents the time hospital staffs' responses to the patient's medical presentations, and with the first ECG done in time the working diagnosis of STEMI could be made and appropriate treatments could be initiated. The time from diagnosis to treatment represents doctors' responses to the diagnosis of disease. Delay in each segment can lead to a longer ischemic time, which has been found associated with higher short-term as well as medium-term to long-term mortality in previous studies.<sup>3-5</sup>

Meanwhile, recent studies indicated that time delays to care among STEMI patients exist universally, showing a worse situation in low and middle income countries than that of high income countries,<sup>6-9</sup> such as 28.7% of ACS patients in Germany but two thirds of STEMI patients in Brazil suffered first ECG delay.<sup>7,8</sup> The delays to care in STEMI patients remain as great challenges to be overcome across all countries.

Up to the present, quite a few studies have tried to better understand the reasons behind these delays and showed that sociodemographic factors (female gender, older age, low educational level), medical histories (diabetes, myocardial infarction), ambiguous heart symptoms, use of private transport were related to longer delay in at least one of the four

1  
2  
3  
4 kinds of time delays.<sup>7 10-12</sup> Based on these findings, some national or regional programs  
5  
6 have been initiated to reduce the delays by targeting at controlling these factors, through  
7  
8 educational campaign, implementation of pre-hospital ECG, establishing regional  
9  
10 collaborative network, etc. and these actions turned out to be effective.<sup>13-16</sup>  
11  
12

13  
14 However, almost all of those studies focused on pre-hospital delay and the patients who  
15  
16 had access to onsite primary percutaneous coronary intervention (PCI) procedure. Those  
17  
18 evidences have limited value for non-PCI hospitals in remote areas where fibrinolysis is  
19  
20 the main reperfusion option for STEMI patients. Therefore, the aims of the present study  
21  
22 are (a) to describe the time delays among STEMI patients in non-PCI hospitals in China,  
23  
24 (b) to identify factors associated to these delays, and (c) to make suggestions for reducing  
25  
26 these delays and improving care of STEMI patients in the similar settings in China and  
27  
28 other countries.  
29  
30  
31  
32  
33  
34  
35

## 36 **METHODS**

### 37 **Study population**

38  
39 We used data of the STEMI patients from a very large registry-based quality of care  
40  
41 improvement trial, the third phase of the Clinical Pathways for Acute Coronary Syndromes  
42  
43 (CPACS-3) in China.<sup>17</sup> In brief, patients in CPACS-3 trial were recruited consecutively  
44  
45 from 101 regional hospitals without the capacity to perform onsite PCI between Oct. 2011  
46  
47 and Nov. 2014. Patients were all over 18 years old and with a final diagnosis of ACS at  
48  
49 discharge or death. The patients who were dead on arrival or within 10 min after hospital  
50  
51 arrival were excluded. For the present study, we further excluded patients whose data of  
52  
53  
54  
55  
56  
57  
58  
59  
60

1  
2  
3  
4 time at either symptoms onset, hospital arrival, having the first ECG or receiving  
5  
6 thrombolytic therapy were missing. From a total 10,294 STEMI patients recruited in  
7  
8 CPACS-3 trial, we had 7,312 patients analyzed with complete data. The study flow  
9  
10 diagram was shown in Figure 1.  
11  
12

13  
14 The Peking University IRB reviewed and approved the CPACS-3 trial and all participating  
15  
16 patients provided written informed consents. The CPACS-3 study registered on  
17  
18 www.clinicaltrials.gov (NCT01398228).  
19  
20

### 21 22 **Data collection and verification**

23  
24 A trained hospital staff member, who was not involved in the management of patients with  
25  
26 ACS, was responsible for collecting and entering data into a dedicated web-based Data  
27  
28 Management System (DMS). Data of each patient was collected from medical records.  
29  
30 The data included socio-demographic information, vital signs relating to the presenting  
31  
32 ACS, medical history, ECG findings, biomarker findings, investigations performed,  
33  
34 treatments administered prior to admission, during hospitalization, and at death or hospital  
35  
36 discharge, final diagnosis and discharge status, major in-hospital clinical events, personal  
37  
38 insurance status and the total cost of hospitalization. Data quality was maintained through  
39  
40 independent centrally managed in-person and on-line study monitoring activities.  
41  
42  
43  
44  
45  
46  
47

### 48 49 **Definitions and outcomes**

50  
51 Symptom onset time was defined as when patient first noted ischemic symptoms lasting  $\geq$   
52  
53 10 min;<sup>18</sup> hospital arrival time was defined as when patient arrived at emergency or  
54  
55 outpatient department for help. Pre-hospital delay was defined as the time from symptoms  
56  
57 onset to hospital arrival (symptoms onset-to-hospital arrival time)  $>$  120 minutes.<sup>11 19 20</sup>  
58  
59  
60

1  
2  
3  
4 Most of hospitals without PCI facility in China are located in rural area, where pre-hospital  
5  
6 emergency system is either not existing or pretty weak. The ambulances serve only as a  
7  
8 transportation vehicle but no ECG equipped or the results not able to be transmitted back  
9  
10 to the hospital. Thrombolytic therapy remains an in-hospital practice throughout the whole  
11  
12 country up to now. Thus, the first ECG delay was defined as the time from patient's arrival  
13  
14 at hospital to the time the patient had the first ECG done ( hospital arrival-to-ECG time) >  
15  
16 10 minutes.<sup>21 22</sup> The working diagnosis of STEMI should had been made by then. The  
17  
18 thrombolytic therapy delay was defined as the time from patient had the first ECG done to  
19  
20 the time the thrombolytic therapy initiated (ECG-to-thrombolytic therapy time) > 10  
21  
22 minutes.<sup>21</sup> In-hospital delay was defined as the time from hospital arrival to the time the  
23  
24 thrombolytic therapy initiated (hospital arrival-to-thrombolytic therapy time) > 30  
25  
26 minutes.<sup>23</sup>

### 35 **Statistical analysis**

36  
37 The baseline characteristics of our study patients were described as percentages for  
38  
39 categorical variables and means with standard deviations (SDs) for continuous variables.  
40  
41 The Wilcoxon tests were adopted for the comparison of time durations and Pearson chi-  
42  
43 square tests for the comparisons of proportions between thrombolytic therapy patients and  
44  
45 non-thrombolytic therapy patients. The logistic regressions with generalized estimating  
46  
47 equations (GEE) were used to explore the associates of the time delays (pre-hospital delay,  
48  
49 first ECG delay, thrombolytic therapy delay, in-hospital delay), with an exchangeable  
50  
51 correlation structure to account for clustering effect within hospitals<sup>24</sup>. Covariates in  
52  
53 multivariate analyses were selected based on clinical and sociodemographic interests and  
54  
55  
56  
57  
58  
59  
60



the results of univariate analyses. Missing data of covariates (all categorical variables) were handled as separated groups in multivariate analyses. We used SAS 9.4 (SAS Institute Inc., Cary, NC, USA) to perform data analyses. The significant level  $\alpha$  was set at 0.05.

### Patient and Public Involvement

No patients but government officers who were responsible for hospital management were involved in the study design of CPACS-3.

## RESULTS

The characteristics of our included patients were summarized in Table 1. Their ages ranged from 19 to 102 years old and had a mean age of 63.4 years old. Most patients were males (71.2%), more than half were farmers (67.2%), and almost all covered by medical insurances (94.1%). Almost a third of them were illiterate. The vital signs, cardiovascular risk factors and history of cardiovascular diseases were shown in Table 1.

Table 1. Characteristics of included patients

| Characteristics            | All STEMI patients (N=7312)* |
|----------------------------|------------------------------|
| Male, No. (%)              | 5205 (71.2)                  |
| Age, Mean (SD), year       | 63.37 (12.42)                |
| Farmer, No. (%)            | 4715 (67.2) (n=7013)         |
| Illiteracy, No. (%)        | 1604 (27.7) (n=5799)         |
| Medical insurance, No. (%) | 5140 (94.1) (n=5462)         |

## Cardiovascular risk factors

|                          |                      |
|--------------------------|----------------------|
| Current smoking, No. (%) | 2488 (34.7) (n=7170) |
| Hypertension, No. (%)    | 4588 (62.8)          |
| Dyslipidemia, No. (%)    | 279 (3.8)            |
| Diabetes, No. (%)        | 851 (11.6)           |

## Cardiovascular disease history

|                                |            |
|--------------------------------|------------|
| Myocardial infarction, No. (%) | 460 (6.3)  |
| Angina, No. (%)                | 805 (11.0) |
| Stroke, No. (%)                | 635 (8.7)  |
| TIA, No. (%)                   | 111 (1.5)  |
| Heart failure, No. (%)         | 160 (2.2)  |

## Symptom onset time

|                      |             |
|----------------------|-------------|
| 00:00-05:59, No. (%) | 1315 (18.0) |
| 06:00-11:59, No. (%) | 2681 (36.7) |
| 12:00-17:59, No. (%) | 1896 (25.9) |
| 18:00-23:59, No. (%) | 1420 (19.4) |

## Vital signs at admission

|                                           |                     |
|-------------------------------------------|---------------------|
| SBP < 90mmHg, No. (%)                     | 407 (5.6) (n=7252)  |
| Heart rates $\geq$ 100 beats/min, No. (%) | 832 (11.6) (n=7192) |

---

STEMI, ST-segment elevation myocardial infarction; SD, standard deviation; TIA, transient ischemic attack; SBP, systolic blood pressure.

\* Total number are shown for variable for which data were not completely reported.

### The delays to care

For all STEMI patients, 67% had experienced the pre-hospital delay and 31% experienced the first ECG delay. The patients receiving thrombolytic therapy had significantly less pre-hospital and first ECG delays, comparing with patients not receiving the therapy. Among the patients receiving thrombolytic therapy, 86% initiated the treatment after 10 minutes of the first ECG done and 68% after 30 minutes of arrival at hospital.

No matter patients received or not thrombolytic therapy, symptoms onset-to-arrival time was the dominant time segment, accounting for two thirds of the total ischemic time among those who received thrombolytic therapy. Patients who did not received thrombolytic therapy suffered more than twice longer symptoms onset-to-arrival time as their counterparts who received thrombolytic therapy. (See Table 2)

Table 2. Time duration and delay in different segments from onset to care among STEMI patients (min)

|                                      | All STEMI patients | Thrombolytic therapy patients | Non-thrombolytic therapy patients | <i>P</i> value* |
|--------------------------------------|--------------------|-------------------------------|-----------------------------------|-----------------|
| Symptoms onset-to-arrival time       |                    |                               |                                   |                 |
| Time duration, median (IQR)          | 210 (110-660)      | 140 (70-240)                  | 360 (130-1364)                    | <0.01           |
| Delay, % (No. of Participants/Total) | 67.1 (4903/7312)   | 54.6 (1669/3057)              | 76.0 (3234/4255)                  | <0.01           |
| Arrival-to-ECG time                  |                    |                               |                                   |                 |
| Time duration, median (IQR)          | 5 (0-17)           | 4 (0-10)                      | 6 (0-24)                          | <0.01           |
| Delay, % (No. of Participants/Total) | 31.4 (2299/7312)   | 23.6 (722/3057)               | 37.1 (1577/4255)                  | <0.01           |
| ECG-to-thrombolytic therapy time     |                    |                               |                                   |                 |
| Time duration, median (IQR)          | -                  | 38 (20-65)                    | -                                 | -               |
| Delay, % (No. of Participants/Total) | -                  | 85.8 (2623/3057)              | -                                 | -               |
| Arrival-to-thrombolytic therapy time |                    |                               |                                   |                 |

|                                      |                |                  |                 |   |
|--------------------------------------|----------------|------------------|-----------------|---|
| Time duration, median (IQR)          | -              | 47 (27-80)       | -               | - |
| Delay, % (No. of Participants/Total) | -              | 67.8 (2072/3057) | -               | - |
| Total time                           |                |                  |                 |   |
| Time duration, median (IQR)          | 260 (145-710)† | 210 (135-320)    | 395 (157-1419)‡ | - |

STEMI, ST-segment elevation myocardial infarction; ECG, Electrocardiograph; IQR, inter quartile range.

\*, comparison between thrombolytic therapy patients and non-thrombolytic therapy patients ; †, representing symptoms onset-to-thrombolytic therapy time among those received thrombolytic therapy but symptoms onset-to-ECG time among those not; ‡, representing onset-to-ECG time.

### Factors associated with the delays

A number of patient-level factors were associated with pre-hospital delay. The patients who were female, older than 65 years, illiterate, farmers, symptom onset during 00:00-05:59 and 06:00-11:59, with a faster heart rate were more likely to experience a pre-hospital delay. While, patients who had a history of myocardial infarction or hypertension, with a cardiac shock at presentation were less likely to experience a pre-hospital delay. (See Table 3)

Few patient level factors were found associated with the first ECG delay, thrombolytic therapy delay and in-hospital delay. Only patients who arrived on regular hours independently associated with higher first ECG delay rate. The first ECG delay was decreasing during the study period. (See Table 3)

Thrombolytic therapy delay was less likely to take place among patients who experienced

pre-hospital delay or first ECG delay. Patients who presented with faster heart rate were more likely to experience a delay in thrombolytic therapy. (See Table 3)

Patients arrived on regular hours and with history of dyslipidemia were less likely to have in-hospital delay. (See Table 3)

Table 3. Multivariate analyses of factors associated with pre-hospital delay, first ECG delay, thrombolytic therapy delay and in-hospital delay, using logistic regression with generalized estimating equations.

|                              | Pre-hospital delay<br>(N=7312) | First ECG delay<br>(N=7312) | Thrombolytic therapy<br>delay (N=3057) | In-hospital delay<br>(N=3057) |
|------------------------------|--------------------------------|-----------------------------|----------------------------------------|-------------------------------|
|                              | OR (95% CI)                    | OR (95% CI)                 | OR (95% CI)                            | OR (95% CI)                   |
| Female                       | 1.20(1.05-1.38)                | 1.03(0.90-1.18)             | 1.07(0.80-1.43)                        | 0.97(0.80-1.16)               |
| ≥ 65 years old               | 1.54(1.37-1.73)                | 1.04(0.92-1.18)             | 0.97(0.77-1.23)                        | 1.11(0.94-1.31)               |
| Illiteracy                   | 1.44(1.17-1.77)                | 1.12(0.92-1.35)             | 0.86(0.59-1.25)                        | 1.03(0.78-1.35)               |
| Farmer                       | 1.61(1.36-1.90)                | 1.02(0.85-1.23)             | 1.21(0.90-1.63)                        | 1.03(0.80-1.34)               |
| Medical insurance            | 1.14(0.73-1.79)                | 1.21(0.88-1.67)             | 0.69(0.32-1.45)                        | 0.82(0.49-1.38)               |
| Current smoking              | 1.00(0.86-1.15)                | 0.90(0.74-1.09)             | 1.07(0.81-1.42)                        | 1.08(0.84-1.39)               |
| History of disease, %        |                                |                             |                                        |                               |
| Myocardial infarction        | 0.67(0.52-0.87)                | 1.20(0.94-1.53)             | 1.16(0.70-1.92)                        | 1.19(0.80-1.78)               |
| Angina                       | 0.91(0.78-1.06)                | 0.82(0.67-1.00)             | 0.84(0.60-1.17)                        | 0.82(0.59-1.14)               |
| Stroke                       | 1.19(0.99-1.42)                | 0.92(0.74-1.14)             | 1.30(0.83-2.03)                        | 1.32(0.92-1.88)               |
| Heart failure                | 1.25(0.84-1.88)                | 0.95(0.64-1.41)             | 0.74(0.24-2.25)                        | 1.09(0.37-3.22)               |
| TIA                          | 0.68(0.45-1.05)                | 1.01(0.56-1.82)             | 1.06(0.46-2.42)                        | 0.63(0.31-1.28)               |
| Diabetes                     | 0.98(0.85-1.13)                | 1.00(0.84-1.18)             | 1.19(0.86-1.64)                        | 1.26(0.94-1.68)               |
| Hypertension                 | 0.89(0.79-0.99)                | 1.01(0.90-1.14)             | 1.03(0.83-1.29)                        | 1.04(0.89-1.22)               |
| Dyslipidemia                 | 1.04(0.80-1.35)                | 1.03(0.74-1.43)             | 0.68(0.40-1.15)                        | 0.62(0.40-0.97)               |
| Time cycles (every 6 months) | 0.97(0.91-1.05)                | 0.87(0.76-0.99)             | 1.01(0.87-1.17)                        | 0.99(0.84-1.15)               |
| Symptom onset time           |                                |                             |                                        |                               |
| 00:00-05:59                  | 2.04(1.80-2.32)                | -                           | -                                      | -                             |
| 06:00-11:59                  | 1.47(1.28-1.68)                | -                           | -                                      | -                             |

|    |                          |                 |                 |                 |                 |
|----|--------------------------|-----------------|-----------------|-----------------|-----------------|
| 1  |                          |                 |                 |                 |                 |
| 2  |                          |                 |                 |                 |                 |
| 3  | 12:00-17:59              | ref             | -               | -               | -               |
| 4  | 18:00-23:59              | 1.00(0.89-1.13) | -               | -               | -               |
| 5  |                          |                 |                 |                 |                 |
| 6  | Vital signs at admission |                 |                 |                 |                 |
| 7  |                          |                 |                 |                 |                 |
| 8  | SBP < 90 mmHg            | 0.57(0.46-0.71) | 0.78(0.59-1.04) | 0.85(0.56-1.28) | 0.86(0.60-1.24) |
| 9  |                          |                 |                 |                 |                 |
| 10 | Heart rates ≥ 100        | 1.71(1.48-1.99) | 1.05(0.90-1.23) | 1.61(1.04-2.50) | 1.35(0.94-1.96) |
| 11 | beats/min                |                 |                 |                 |                 |
| 12 | Arrived on regular       | -               | 1.12(1.00-1.25) | 0.94(0.77-1.15) | 0.81(0.68-0.96) |
| 13 | hours                    |                 |                 |                 |                 |
| 14 | Pre-hospital delay       | -               | 1.14(0.99-1.32) | 0.78(0.64-0.95) | 0.86(0.73-1.02) |
| 15 | First ECG delay          | -               | -               | 0.56(0.41-0.78) |                 |
| 16 | CPACS-3                  | 1.08(0.86-1.36) | 0.78(0.51-1.18) | 1.03(0.65-1.63) | 0.73(0.47-1.13) |
| 17 | intervention*            |                 |                 |                 |                 |
| 18 |                          |                 |                 |                 |                 |
| 19 |                          |                 |                 |                 |                 |

ECG, electrocardiograph; OR, odds ratio; TIA, transient ischemic attack; SBP, systolic blood pressure.

\*, the intervention of the third phase of the Clinical Pathways for Acute Coronary Syndromes study.

The results of univariate analyses of four kinds of delays were shown in Supplementary Table 1.

### **Association of receiving thrombolytic therapy with pre-hospital delay and first ECG delay**

Patients who suffered pre-hospital delay or first ECG delay were less likely to receive thrombolytic therapy at hospital. Even further adjusted for potential confounders, pre-hospital delay and first ECG delay separately linked to 32% and 28% reductions of receiving thrombolytic therapy among our patients. (See Table 4)

Table 4. Association of receiving thrombolytic therapy with pre-hospital delay and first ECG delay.

| Thrombolytic therapy |                     |                 |                 |
|----------------------|---------------------|-----------------|-----------------|
|                      | rate (%)            | Crude RR*       | Adjusted RR†    |
|                      | (No. of             | (95% CI)        | (95% CI)        |
|                      | Participants/Total) |                 |                 |
| Pre-hospital delay   |                     |                 |                 |
| Yes                  | 34.0 (1669/4903)    | 0.62(0.58-0.67) | 0.68(0.64-0.73) |
| No                   | 57.6 (1388/2409)    |                 |                 |
| First ECG delay      |                     |                 |                 |
| Yes                  | 31.4 (722/2299)     | 0.71(0.66-0.76) | 0.72(0.66-0.78) |
| No                   | 46.6 (2335/5013)    |                 |                 |

ECG, electrocardiograph; RR, risk ratio.

\*, crude RR calculated from logistic regression with GEE model only included pre-hospital delay and first ECG delay; †, further adjusted for sex, age, education level, occupation, medical insurance, current smoking, histories of myocardial infarction, angina, stroke, heart failure, transient ischemic attack, diabetes, hypertension, dyslipidemia, time cycles (every 6 months), vital signs at admission, arrived on regular hours, CPACS-3 intervention.

## DISCUSSION

### Main results

In the present study, we found that two thirds of STEMI patients in non-PCI hospitals in China had the pre-hospital delay after their disease onsets in their seeking for medical care;

1  
2  
3  
4 and about one third of them had their first ECG delayed after they arrived at hospitals,  
5  
6 according to the criteria from ESC and ACC/AHA guidelines or previous researches.<sup>11 19</sup>

7  
8  
9 <sup>20</sup> Among patients who received their thrombolytic therapy as high as 86% of them had  
10  
11 the treatment delayed according to the new criteria of ESC (time from ECG to thrombolytic  
12  
13 therapy >10 min.)<sup>21</sup> and 68% had the treatment delayed according to the old criteria,<sup>23</sup>  
14  
15 i.e after 30 minutes of hospital arrival.  
16  
17

18  
19 Compared with STEMI patients from large medical centers in metropolitan areas of  
20  
21 China<sup>11</sup> and other developed countries<sup>12 25</sup>, where the median symptoms onset-to-arrival  
22  
23 time was about 113 to 150 minutes, the median time found in our study was much longer,  
24  
25 about 210 minutes. But our results were similar to that was reported in the Middle East<sup>9</sup>  
26  
27 and shorter than that in India<sup>26</sup>. The first ECG delay in our study was much better than that  
28  
29 in Brazil (67%)<sup>7</sup> and India (55%)<sup>6</sup> but worse than that in developed countries like Japan  
30  
31 (18.4%)<sup>27</sup> and Germany (28.7%)<sup>8</sup>. As previous studies including ours have demonstrated  
32  
33 the significant association of ischemic time with the short and long term mortality among  
34  
35 patients with STEMI, our findings in this study highlighted the urgent needs to reduce the  
36  
37 delays to care for STEMI patients in the similar settings in China and other developing  
38  
39 countries.  
40  
41  
42  
43  
44  
45  
46

47  
48 Our further analyses showed that the pre-hospital and first ECG delays were significantly  
49  
50 associated with the risk of not receiving thrombolytic therapy. In fact, only 43% of our  
51  
52 study patients received thrombolytic therapy. Since these patients admitted to non-PCI  
53  
54 hospitals of China often lived far away from large tertiary medical centers equipped with  
55  
56 PCI facilities, thrombolytic therapy was the only revascularization treatment they could  
57  
58  
59  
60



1  
2  
3  
4 have in the first line. Reducing the pre-hospital and first ECG delays should have great  
5  
6 potential to permit more patients with thrombolytic therapy, which in turn will save many  
7  
8 more lives in these remote areas. In our study, half of the patients not receiving  
9  
10 thrombolytic therapy arrived at hospital beyond 6 hours after their disease onsets and hence  
11  
12 lost the best opportunity to receive the treatment. If the median time could be reduced to 3  
13  
14 hours, probably the most of these patients would still have chance for the thrombolytic  
15  
16 therapy.  
17  
18  
19  
20  
21

22 The study on the factors associated with the delays to care could help to find solutions to  
23  
24 reduce the delays. Like previous studies, the symptoms onset-to-door time took the most  
25  
26 part of the total ischemic time, and we should pay more attention to reduce the pre-hospital  
27  
28 delay. In our study, patients who were older than 75 years old, illiterate, and farmer were  
29  
30 found more likely to have the pre-hospital delay. This implies that efforts should be made  
31  
32 to improve the medical access for the vulnerable patients with low social economic status.  
33  
34  
35  
36

37 A recent study among Indian STEMI patients supports our findings and found that the  
38  
39 difficulty of arranging money was an important factor leading to the pre-hospital delay.<sup>6</sup>  
40  
41 Furthermore, the elderly and illiterate patients might misinterpret the symptoms of STEMI  
42  
43 with symptoms of ageing, aggravating their pre-hospital delays.<sup>20</sup>  
44  
45  
46  
47

48 Our findings that women patients were more likely to have pre-hospital delay among  
49  
50 STEMI patients have been reported in previous studies.<sup>9 11 20 28 29</sup> The possible explanations  
51  
52 include women suffering more atypical symptoms,<sup>30 31</sup> women discriminating culture and  
53  
54 lower social economic status,<sup>32</sup> greater sympathy that prevent women to trouble anyone<sup>33</sup>  
55  
56 etc..  
57  
58  
59  
60

1  
2  
3  
4 Patients with history of myocardial infarction, hypertension, or presented with shock at  
5  
6 admission were found less likely to have the pre-hospital delay. We believe this is because  
7  
8 these patients had more knowledge of myocardial infarction and realized the importance  
9  
10 of in-time medical rescue. We believe the reason for patients who presented with shock at  
11  
12 admission were found less likely to have pre-hospital delay was due to the severity of the  
13  
14 symptom, which alarmed the patient itself, family members or a companion person that  
15  
16 helped to access medical care in time. In contrast, we believe the reason for patients who  
17  
18 presented with tachycardia at admission more likely to have pre-hospital delay was  
19  
20 probably an inverse causal relationship, i.e. the tachycardia was a result of pre-hospital  
21  
22 delay.  
23  
24  
25  
26  
27  
28  
29

30 Similar to previous studies,<sup>6 11 12</sup> we also found patients suffered pre-hospital delay had  
31  
32 their symptom onset most during 00:00 to 05:59. Most people are in sleep during this time,  
33  
34 and most patients would not want to bother others at this time if they believe the disease  
35  
36 was not severe. Those patients might be prone to going to the hospital the next day avoiding  
37  
38 troublesome visits at late night. The phenomenon might be exaggerated by the fact that the  
39  
40 most of our study patients were living in rural areas. The barriers for patients living in rural  
41  
42 areas seeking for medical service include long distance, poor transport facilities and costs  
43  
44 concerns. The evidence that patients who had shorter symptoms onset-to-door time were  
45  
46 with less stroke or heart failure history supported this explanation to some extent.  
47  
48  
49  
50  
51

52  
53 As the first ECG delay reflects more medical staff's rather than patients' responses to the  
54  
55 disease, no patient side factor was found associated with the first ECG delay in our study.  
56  
57

58 But first ECG delay was found more likely to take place in patients arriving on regular  
59  
60

1  
2  
3  
4 hours. The same results were also found among NSTEMI-ACS patients in CRUSADE  
5  
6 Quality Improvement Initiative study.<sup>34</sup> Although the reasons are still unknown, this  
7  
8 relationship may reflect the medical resources competition by routine clinical patients who  
9  
10 rash into hospitals for care. In China, making appointment for care is not a common  
11  
12  
13  
14 practice.

15  
16  
17 Recent STREAM trial demonstrated that thrombolytic therapy (median time from  
18  
19 randomization to bolus recorded was 9 min) was as effective as primary PCI beyond 1  
20  
21 hour among STEMI patients who presented within 3 hours after symptom onset.<sup>35</sup> Based  
22  
23 on the results from the STREAM trial, European Society of Cardiology recommended time  
24  
25 from STEMI diagnosis to the start of fibrinolysis to be within 10 min.<sup>21</sup> According to the  
26  
27 new ESC guidelines, only 14% of patients who received fibrinolysis achieved the 10 min  
28  
29 target in our study. Even use the old criteria (in-hospital time > 30 min.), there were only  
30  
31 32% of patients received thrombolytic therapy without delay. We consider this new ESC  
32  
33 target time may be ideal but quite unrealistic in rural China now, considering there are  
34  
35 many barriers that prevent from initiating the thrombolytic therapy in such a short time.  
36  
37 Particularly, the new type of fibrinolytic agents (Tenecteplase), which was used in the  
38  
39 STREAM trial, is not available yet in China. Hopefully, the ECG-to- thrombolytic therapy  
40  
41 time can be shortened as the recombinant human TNK tissue-type plasminogen activator  
42  
43 (rhTNKtPA) has been approved by China FDA recently, which is applied in bolus at once  
44  
45 and easy for administration. Meanwhile, due to the possible severe bleedings, the patient  
46  
47 inform consent often takes a long time, particularly when the doctor-patient relationship is  
48  
49 not good and the medical insurance could not cover the entire costs.  
50  
51  
52  
53  
54  
55  
56  
57  
58  
59  
60

1  
2  
3  
4 One of the interesting findings from our study was that among patients receiving  
5  
6 thrombolytic therapy, the treatment delay was lower in patients who had pre-hospital delay  
7  
8 or first ECG delay, reflecting medical team's "time catch-up" effort after the patient was  
9  
10 confirmed STEMI diagnosis by ECG examination. Physicians were apt to react more  
11  
12 rapidly to make up previous delays, as the effects of the treatment are time-dependent.  
13  
14 Nevertheless, we should understand that physicians' "catch-up effect" only had limited  
15  
16 value for shortening total ischemic time (see Supplementary Tables 2-4), as the major  
17  
18 segment was the symptoms onset-to-hospital arrival time. More emphases should be put  
19  
20 onto reducing the pre-hospital delay.  
21  
22  
23  
24  
25

26  
27 Our analysis on factors associated with in-hospital delay showed that arrival on regular  
28  
29 hour was negatively associated with the risk of in-hospital delay. We believe that the  
30  
31 results indicated physicians at regular hours had more capability to 'catch up' the  
32  
33 preceding delays once the diagnosis of STEMI was made.  
34  
35  
36

37  
38 Another finding was that even no access to PCI, only half eligible patients (51%) received  
39  
40 thrombolytic therapy. Previous study also reported low thrombolytic therapy rate (56.1%,  
41  
42 2011) among eligible STEMI patients in non-PCI centers in China.<sup>36</sup> That implies there  
43  
44 were other hurdles for patients to receive thrombolytic treatment besides pre-hospital delay.  
45  
46  
47

48  
49 The possible explaining reasons include doctors' concerns/worries on patient  
50  
51 safety/adverse events, inadequate or no healthcare insurance to cover the cost, and time  
52  
53 waiting for the direct family members to agree and sign the inform consent for initiating  
54  
55 thrombolytic therapy.  
56  
57

### 58 **Strengths and limitations**

59  
60

1  
2  
3  
4 The strengths of our study include: 1) A large sample from non-PCI hospitals across China.  
5  
6 The results could be extended to other places of China and the world with the similar  
7  
8 settings. 2) The data were collected prospectively, under strict supervision by an  
9  
10 experienced project management team and a steering committee composed of international  
11  
12 expertise in cardiology, epidemiology and biostatistics.  
13  
14  
15

16  
17 The present study also has several limitations. First, we could not exclude the influence of  
18  
19 patient's recall bias for symptom onset time. However, data were collected during patient's  
20  
21 admission within a very narrow time after their symptom onset. Secondly, we are not 100%  
22  
23 sure about the accuracy of the diagnosis of STEMI in our study. We did not collect  
24  
25 patient's original ECG file for further independent validation of the diagnoses. Since  
26  
27 CPACS-3 study had professional project management with both on-line and on-site data  
28  
29 monitoring we believe incorrect diagnosis for STEMI should be minimum. Another  
30  
31 limitation is that survivor bias might exist as patients who were dead on arrival or within  
32  
33 10 min of hospital arrival were excluded. Additionally, we did not collect the onset  
34  
35 symptoms and hence could hardly study on the possible associations between the onset  
36  
37 symptoms and the pre-hospital delay to care.  
38  
39  
40  
41  
42  
43  
44

## 45 **CONCLUSIONS**

46  
47  
48 In conclusion, the present study demonstrated that STEMI patients in non-PCI hospitals in  
49  
50 China suffered severe time delays to care. Among the four types of delay, pre-hospital  
51  
52 delay should be emphasized although the other three still have rooms for improvement.  
53  
54 Future efforts should be made to improve the pre-hospital delay among vulnerable  
55  
56 populations with low social economic status.  
57  
58  
59  
60

**Implication**

Establishment of pre-hospital rescue system facilitated with ECG examination and results transmission equipment as well as population-wide health education of in-time seeking medical care and chest pain might offer solutions to improve the current clinical practice and enhance the quality of care among STEMI patients.

For peer review only

## Author contributions

LF, ML and YW conceived this study. YW obtained research funding. LF conceived and conducted statistical analyses. WX and XL provided statistical advice and statistical validation. AZ supervised the conduct of the study and data collection. LF, ML, LL, WX, YW and RG interpreted the results. LF drafted the manuscript and all authors contributed substantially to its revision. YW takes responsibility for the paper as a whole.

## Acknowledgements

The CPACS-3 Study Steering Committee (sorted by the first letter of the family name):

Kalipso Chalkidou (National Institute for Health and Clinical Excellence), Runlin Gao\* (Cardiovascular Institute and Fuwai Hospital), Dayi Hu (Peking University People's Hospital), Yong Huo (Peking University First Hospital), Yahui Jiao (NHFPC of China), Lingzhi Kong (NHFPC of China), Anushka Patel (The George Institute for Global Health), Eric Peterson (Duke Clinical Research Institute), Fiona Turnbull (The George Institute for Global Health), Mark Woodward (The George Institute for Global Health), Yangfeng Wu\* (The George Institute for Global Health at PUHSC ).

\*Co-principal investigators.

## Funding

CPACS-3 study is an investigator sponsored study supported by Sanofi. The George Institute for Global Health at PUHSC sponsored the study and owns the data. However, the authors are solely responsible for the design and conduct of this study, all study analyses, the drafting and editing of the manuscript, and its final contents.

## Conflict of interest

None declared.

## Data availability statement

The George Institute for Global Health at PUHSC owns the de-identified participant data of CPACS3 study. The data are available after a formal application and the approval by The CPACS-3 Study Steering Committee.

## REFERENCES

1. Solhpour A, Chang KW, Arain SA, et al. Ischemic time is a better predictor than door-to-balloon time for mortality and infarct size in ST-elevation myocardial infarction. *Catheterization and cardiovascular interventions : official journal of the Society for Cardiac Angiography & Interventions* 2016;87(7):1194-200. doi: 10.1002/ccd.26230 [published Online First: 2015/09/04]
2. Chughtai H, Ratner D, Pozo M, et al. Prehospital delay and its impact on time to treatment in ST-elevation myocardial infarction. *The American journal of emergency medicine* 2011;29(4):396-400. doi: 10.1016/j.ajem.2009.11.006 [published Online First: 2010/09/10]
3. Berger PB, Ellis SG, Holmes DR, Jr., et al. Relationship between delay in performing direct coronary angioplasty and early clinical outcome in patients with acute myocardial infarction: results from the global use of strategies to open occluded arteries in Acute Coronary Syndromes (GUSTO-IIb) trial. *Circulation* 1999;100(1):14-20. [published Online First: 1999/07/07]
4. Foo CY, Bonsu KO, Nallamotheu BK, et al. Coronary intervention door-to-balloon time and outcomes in ST-elevation myocardial infarction: a meta-analysis. *Heart (British Cardiac Society)*



- 1  
2  
3  
4 2018;104(16):1362-69. doi: 10.1136/heartjnl-2017-312517 [published Online First: 2018/02/14]  
5  
6  
7 5. Benamer H, Bataille S, Tafflet M, et al. Longer pre-hospital delays and higher mortality in women  
8  
9 with STEMI: the e-MUST Registry. *EuroIntervention : journal of EuroPCR in collaboration with*  
10  
11 *the Working Group on Interventional Cardiology of the European Society of Cardiology*  
12  
13 2016;12(5):e542-9. doi: 10.4244/eijv12i5a93 [published Online First: 2016/08/09]  
14  
15  
16  
17 6. George L, Ramamoorthy L, Satheesh S, et al. Prehospital delay and time to reperfusion therapy in  
18  
19 ST elevation myocardial infarction. *Journal of emergencies, trauma, and shock* 2017;10(2):64-  
20  
21 69. doi: 10.4103/0974-2700.201580 [published Online First: 2017/04/04]  
22  
23  
24  
25 7. Duraes AR, Bitar YS, Freitas ACT, et al. Gender differences in ST-elevation myocardial infarction  
26  
27 (STEMI) time delays: experience of a public health service in Salvador-Brazil. *American journal*  
28  
29 *of cardiovascular disease* 2017;7(5):102-07. [published Online First: 2017/11/29]  
30  
31  
32  
33 8. Post F, Giannitsis E, Riemer T, et al. Pre- and early in-hospital procedures in patients with acute  
34  
35 coronary syndromes: first results of the "German chest pain unit registry". *Clinical research in*  
36  
37 *cardiology : official journal of the German Cardiac Society* 2012;101(12):983-91. doi:  
38  
39 10.1007/s00392-012-0487-4 [published Online First: 2012/07/26]  
40  
41  
42  
43 9. Shehab A, AlHabib KF, Bhagavathula AS, et al. Clinical presentation, Quality of care, Risk factors  
44  
45 and Outcomes in Women with Acute ST-Elevation Myocardial Infarction (STEMI): An  
46  
47 Observational Report from Six Middle Eastern Countries. *Current vascular pharmacology*  
48  
49 2018;16:000-00. doi: 10.2174/1570161116666180315104820 [published Online First:  
50  
51 2018/03/16]  
52  
53  
54  
55  
56 10. Sullivan AL, Beshansky JR, Ruthazer R, et al. Factors associated with longer time to treatment for  
57  
58 patients with suspected acute coronary syndromes: a cohort study. *Circulation Cardiovascular*  
59  
60

- 1  
2  
3  
4 *quality and outcomes* 2014;7(1):86-94. doi: 10.1161/circoutcomes.113.000396 [published  
5  
6  
7 Online First: 2014/01/16]  
8
- 9 11. Peng YG, Feng JJ, Guo LF, et al. Factors associated with prehospital delay in patients with ST-  
10  
11 segment elevation acute myocardial infarction in China. *The American journal of emergency*  
12  
13 *medicine* 2014;32(4):349-55. doi: 10.1016/j.ajem.2013.12.053 [published Online First:  
14  
15 2014/02/12]  
16  
17
- 18 12. Park YH, Kang GH, Song BG, et al. Factors related to prehospital time delay in acute ST-segment  
19  
20 elevation myocardial infarction. *Journal of Korean medical science* 2012;27(8):864-9. doi:  
21  
22 10.3346/jkms.2012.27.8.864 [published Online First: 2012/08/10]  
23  
24  
25
- 26 13. Naegeli B, Radovanovic D, Rickli H, et al. Impact of a nationwide public campaign on delays and  
27  
28 outcome in Swiss patients with acute coronary syndrome. *European journal of cardiovascular*  
29  
30 *prevention and rehabilitation : official journal of the European Society of Cardiology, Working*  
31  
32 *Groups on Epidemiology & Prevention and Cardiac Rehabilitation and Exercise Physiology*  
33  
34 2011;18(2):297-304. doi: 10.1177/1741826710389386 [published Online First: 2011/04/01]  
35  
36  
37
- 38 14. Quinn T, Johnsen S, Gale CP, et al. Effects of prehospital 12-lead ECG on processes of care and  
39  
40 mortality in acute coronary syndrome: a linked cohort study from the Myocardial Ischaemia  
41  
42 National Audit Project. *Heart (British Cardiac Society)* 2014;100(12):944-50. doi:  
43  
44 10.1136/heartjnl-2013-304599 [published Online First: 2014/04/16]  
45  
46  
47
- 48 15. Mooney M, McKee G, Fealy G, et al. A review of interventions aimed at reducing pre-hospital delay  
49  
50 time in acute coronary syndrome: what has worked and why? *Eur J Cardiovasc Nurs*  
51  
52 2012;11(4):445-53. doi: 10.1016/j.ejcnurse.2011.04.003 [published Online First: 2011/05/14]  
53  
54  
55
- 56 16. Duan T, Xiang D, Qin W, et al. [Impact of establishing regional collaborative network on reperfusion  
57  
58  
59  
60

- 1  
2  
3  
4 time and prognosis of patients with ST-segment elevated myocardial infarction admitting to  
5  
6 community hospitals without percutaneous coronary intervention capacity]. *Zhonghua xin xue*  
7  
8 *guan bing za zhi* 2014;42(8):641-5. [published Online First: 2014/11/13]  
9  
10  
11  
12 17. Wu Y, Li S, Patel A, et al. Effect of a Quality of Care Improvement Initiative in Patients With Acute  
13  
14 Coronary Syndrome in Resource-Constrained Hospitals in China: A Randomized Clinical Trial.  
15  
16 *JAMA Cardiol* 2019 doi: 10.1001/jamacardio.2019.0897 [published Online First: 2019/04/18]  
17  
18  
19  
20 18. Cannon CP, Brindis RG, Chaitman BR, et al. 2013 ACCF/AHA key data elements and definitions  
21  
22 for measuring the clinical management and outcomes of patients with acute coronary  
23  
24 syndromes and coronary artery disease: a report of the American College of Cardiology  
25  
26 Foundation/American Heart Association Task Force on Clinical Data Standards (Writing  
27  
28 Committee to Develop Acute Coronary Syndromes and Coronary Artery Disease Clinical Data  
29  
30 Standards). *Circulation* 2013;127(9):1052-89. doi: 10.1161/CIR.0b013e3182831a11 [published  
31  
32 Online First: 2013/01/30]  
33  
34  
35  
36  
37  
38 19. Ladwig KH, Fang X, Wolf K, et al. Comparison of Delay Times Between Symptom Onset of an Acute  
39  
40 ST-elevation Myocardial Infarction and Hospital Arrival in Men and Women <65 Years  
41  
42 Versus >=65 Years of Age.: Findings From the Multicenter Munich Examination of Delay in  
43  
44 Patients Experiencing Acute Myocardial Infarction (MEDEA) Study. *The American journal of*  
45  
46 *cardiology* 2017;120(12):2128-34. doi: 10.1016/j.amjcard.2017.09.005 [published Online First:  
47  
48 2017/11/11]  
49  
50  
51  
52  
53 20. Wah W, Pek PP, Ho AF, et al. Symptom-to-door delay among patients with ST-segment elevation  
54  
55 myocardial infarction in Singapore. *Emergency medicine Australasia : EMA* 2017;29(1):24-32.  
56  
57 doi: 10.1111/1742-6723.12689 [published Online First: 2016/10/12]  
58  
59  
60

- 1  
2  
3  
4 21. Ibanez B, James S, Agewall S, et al. 2017 ESC Guidelines for the management of acute myocardial  
5  
6 infarction in patients presenting with ST-segment elevation: The Task Force for the  
7  
8 management of acute myocardial infarction in patients presenting with ST-segment elevation  
9  
10 of the European Society of Cardiology (ESC). *Eur Heart J* 2017;00:1-66. doi:  
11  
12 10.1093/eurheartj/ehx393  
13  
14  
15  
16  
17 22. O'Gara PT, Kushner FG, Ascheim DD, et al. 2013 ACCF/AHA guideline for the management of ST-  
18  
19 elevation myocardial infarction: a report of the American College of Cardiology  
20  
21 Foundation/American Heart Association Task Force on Practice Guidelines. *Circulation*  
22  
23 2013;127(4):e362-425. doi: 10.1161/CIR.0b013e3182742cf6  
24  
25  
26  
27 23. Steg PG, James SK, Atar D, et al. ESC Guidelines for the management of acute myocardial  
28  
29 infarction in patients presenting with ST-segment elevation. *Eur Heart J* 2012;33(20):2569-619.  
30  
31 doi: 10.1093/eurheartj/ehs215 [published Online First: 2012/08/28]  
32  
33  
34  
35 24. Hussey MA, Hughes JP. Design and analysis of stepped wedge cluster randomized trials.  
36  
37 *Contemporary clinical trials* 2007;28(2):182-91. doi: 10.1016/j.cct.2006.05.007 [published  
38  
39 Online First: 2006/07/11]  
40  
41  
42  
43 25. Fujii T, Masuda N, Suzuki T, et al. Impact of transport pathways on the time from symptom onset of  
44  
45 ST-segment elevation myocardial infarction to door of coronary intervention facility. *Journal of*  
46  
47 *cardiology* 2014;64(1):11-8. doi: 10.1016/j.jjcc.2013.11.008 [published Online First: 2014/01/09]  
48  
49  
50  
51 26. Isezuo S, Subban V, Krishnamoorthy J, et al. Characteristics, treatment and one-year outcomes of  
52  
53 patients with acute coronary syndrome in a tertiary hospital in India. *Indian heart journal*  
54  
55 2014;66(2):156-63. doi: 10.1016/j.ihj.2013.12.023 [published Online First: 2014/05/13]  
56  
57  
58  
59 27. Noguchi M, Ako J, Morimoto T, et al. Modifiable factors associated with prolonged door to balloon  
60

- 1  
2  
3  
4 time in patients with ST-segment elevation myocardial infarction undergoing primary  
5  
6 percutaneous coronary intervention. *Heart and vessels* 2018;33(10):1139-48. doi:  
7  
8 10.1007/s00380-018-1164-y [published Online First: 2018/05/08]  
9  
10  
11 28. Sederholm Lawesson S, Isaksson RM, Ericsson M, et al. Gender disparities in first medical contact  
12  
13 and delay in ST-elevation myocardial infarction: a prospective multicentre Swedish survey  
14  
15 study. *BMJ open* 2018;8(5):e020211. doi: 10.1136/bmjopen-2017-020211 [published Online  
16  
17 First: 2018/05/05]  
18  
19  
20  
21 29. Zhang B, Zhang W, Huang R, et al. Gender and Age Differences Associated With Prehospital Delay  
22  
23 in Chinese Patients Presenting With ST-Elevation Myocardial Infarction. *The Journal of*  
24  
25 *cardiovascular nursing* 2016;31(2):142-50. doi: 10.1097/jcn.0000000000000219 [published  
26  
27 Online First: 2014/11/25]  
28  
29  
30  
31 30. Allana S, Moser DDK, Ali DTS, et al. Sex differences in symptoms experienced, knowledge about  
32  
33 symptoms, symptom attribution, and perceived urgency for treatment seeking among acute  
34  
35 coronary syndrome patients in Karachi Pakistan. *Heart Lung* 2018;47(6):584-90. doi:  
36  
37 10.1016/j.hrtlng.2018.06.009 [published Online First: 2018/08/16]  
38  
39  
40  
41 31. Sederholm Lawesson S, Isaksson RM, Thylen I, et al. Gender differences in symptom presentation  
42  
43 of ST-elevation myocardial infarction - An observational multicenter survey study. *International*  
44  
45 *journal of cardiology* 2018;264:7-11. doi: 10.1016/j.ijcard.2018.03.084 [published Online First:  
46  
47 2018/04/13]  
48  
49  
50  
51 32. Allana S, Khowaja K, Ali TS, et al. Gender differences in factors associated with prehospital delay  
52  
53 among acute coronary syndrome patients in Pakistan. *J Transcult Nurs* 2015;26(5):480-90. doi:  
54  
55 10.1177/1043659614524787 %/ (c) The Author(s) 2014.  
56  
57  
58  
59  
60

- 1  
2  
3  
4 33. Moser DK, McKinley S, Dracup K, et al. Gender differences in reasons patients delay in seeking  
5  
6 treatment for acute myocardial infarction symptoms. *Patient education and counseling*  
7  
8 2005;56(1):45-54. doi: 10.1016/j.pec.2003.11.011 [published Online First: 2004/12/14]  
9  
10  
11 34. Diercks DB, Peacock WF, Hiestand BC, et al. Frequency and consequences of recording an  
12  
13 electrocardiogram >10 minutes after arrival in an emergency room in non-ST-segment  
14  
15 elevation acute coronary syndromes (from the CRUSADE Initiative). *The American journal of*  
16  
17 *cardiology* 2006;97(4):437-42. doi: 10.1016/j.amjcard.2005.09.073 [published Online First:  
18  
19 2006/02/08]  
20  
21  
22 35. Armstrong PW, Gershlick AH, Goldstein P, et al. Fibrinolysis or primary PCI in ST-segment elevation  
23  
24 myocardial infarction. *The New England journal of medicine* 2013;368(15):1379-87. doi:  
25  
26 10.1056/NEJMoa1301092 [published Online First: 2013/03/12]  
27  
28  
29 36. Li J, Li X, Ross JS, et al. Fibrinolytic therapy in hospitals without percutaneous coronary intervention  
30  
31 capabilities in China from 2001 to 2011: China PEACE-retrospective AMI study. *European heart*  
32  
33 *journal Acute cardiovascular care* 2017;6(3):232-43. doi: 10.1177/2048872615626656  
34  
35  
36  
37  
38  
39  
40 [published Online First: 2016/01/21]  
41  
42  
43  
44  
45  
46  
47  
48  
49  
50  
51  
52  
53  
54  
55  
56  
57  
58  
59  
60

Figure 1. Study flow diagram of included patient

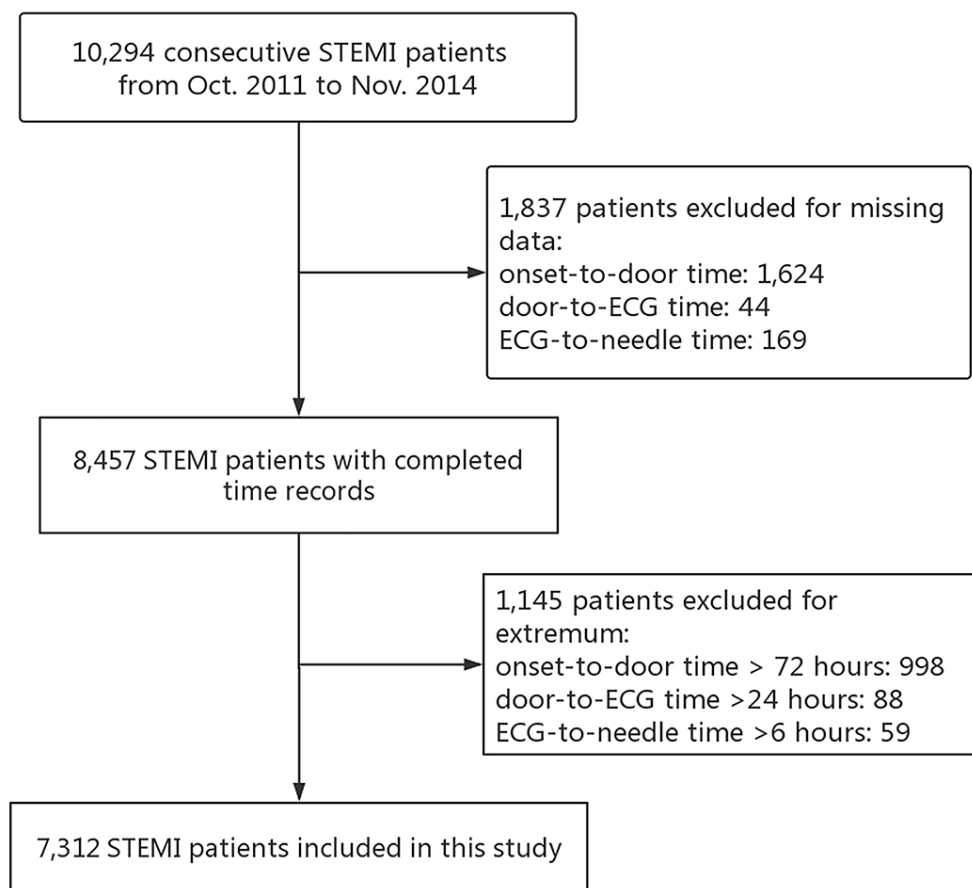

Figure 1. Study flow diagram of included patient

Supplementary Table 1. Univariate analyses of four kinds of delays, using logistic regression with generalized estimating equations.

|                           | Pre-hospital delay<br>(N=7312) |         | First ECG delay<br>(N=7312) |         | Thrombolytic therapy delay<br>(N=3057) |         | In-hospital delay<br>(N=3057) |         |
|---------------------------|--------------------------------|---------|-----------------------------|---------|----------------------------------------|---------|-------------------------------|---------|
|                           | OR (95% CI)                    | P value | OR (95% CI)                 | P value | OR (95% CI)                            | P value | OR (95% CI)                   | P value |
| Gender                    |                                |         |                             |         |                                        |         |                               |         |
| Female                    | 1.56(1.38-1.76)                | <0.01   | 1.13(1.01-1.26)             | 0.04    | 0.98(0.76-1.26)                        | 0.86    | 0.96(0.80-1.13)               | 0.60    |
| Male                      | ref                            |         | ref                         |         | ref                                    |         | ref                           |         |
| Age                       |                                |         |                             |         |                                        |         |                               |         |
| ≥65 years old             | 1.75(1.58-1.94)                | <0.01   | 1.13(1.00-1.28)             | 0.05    | 0.93(0.74-1.18)                        | 0.56    | 1.07(0.87-1.30)               | 0.52    |
| <65 years old             | ref                            |         | ref                         |         | ref                                    |         | ref                           |         |
| Education level           |                                |         |                             |         |                                        |         |                               |         |
| Illiteracy                | 1.92(1.58-2.34)                | <0.01   | 1.18(0.98-1.43)             | 0.08    | 0.87(0.62-1.21)                        | 0.40    | 1.03(0.79-1.33)               | 0.83    |
| Others                    | ref                            |         | ref                         |         | ref                                    |         | ref                           |         |
| Occupation                |                                |         |                             |         |                                        |         |                               |         |
| Farmer                    | 1.74(1.48-2.06)                | <0.01   | 1.06(0.88-1.28)             | 0.53    | 1.13(0.84-1.53)                        | 0.40    | 1.03(0.79-1.34)               | 0.80    |
| Others                    | ref                            |         | ref                         |         | ref                                    |         | ref                           |         |
| Medical insurance         |                                |         |                             |         |                                        |         |                               |         |
| Yes                       | 1.08(0.72-1.64)                | 0.70    | 1.19(0.85-1.68)             | 0.31    | 0.69(0.33-1.43)                        | 0.31    | 0.81(0.49-1.33)               | 0.41    |
| No                        | ref                            |         | ref                         |         | ref                                    |         | ref                           |         |
| Smoking status            |                                |         |                             |         |                                        |         |                               |         |
| Current smoking           | 0.78(0.68-0.89)                | <0.01   | 0.85(0.72-1.00)             | 0.05    | 1.03(0.77-1.38)                        | 0.82    | 1.06(0.80-1.41)               | 0.67    |
| Others                    | ref                            |         | ref                         |         | ref                                    |         | ref                           |         |
| History of disease        |                                |         |                             |         |                                        |         |                               |         |
| Myocardial infarction     |                                |         |                             |         |                                        |         |                               |         |
| Yes                       | 0.68(0.54-0.86)                | <0.01   | 1.14(0.90-1.44)             | 0.28    | 1.11(0.67-1.81)                        | 0.69    | 1.23(0.84-1.79)               | 0.29    |
| No                        | ref                            |         | ref                         |         | ref                                    |         | ref                           |         |
| Angina                    |                                |         |                             |         |                                        |         |                               |         |
| Yes                       | 0.87(0.74-1.01)                | 0.07    | 0.86(0.71-1.06)             | 0.15    | 0.87(0.61-1.24)                        | 0.46    | 0.86(0.61-1.21)               | 0.38    |
| No                        | ref                            |         | ref                         |         | ref                                    |         | ref                           |         |
| Stroke                    |                                |         |                             |         |                                        |         |                               |         |
| Yes                       | 1.15(0.97-1.36)                | 0.11    | 0.92(0.76-1.13)             | 0.44    | 1.28(0.82-1.98)                        | 0.27    | 1.25(0.88-1.76)               | 0.21    |
| No                        | ref                            |         | ref                         |         | ref                                    |         | ref                           |         |
| Heart failure             |                                |         |                             |         |                                        |         |                               |         |
| Yes                       | 1.30(0.86-1.97)                | 0.21    | 0.96(0.63-1.47)             | 0.86    | 0.71(0.25-2.02)                        | 0.53    | 1.05(0.37-2.93)               | 0.93    |
| No                        | ref                            |         | ref                         |         | ref                                    |         | ref                           |         |
| Transient ischemic attack |                                |         |                             |         |                                        |         |                               |         |
| Yes                       | 0.80(0.53-1.23)                | 0.32    | 0.88(0.48-1.61)             | 0.68    | 1.19(0.55-2.58)                        | 0.65    | 0.67(0.34-1.31)               | 0.24    |
| No                        | ref                            |         | ref                         |         | ref                                    |         | ref                           |         |
| Diabetes                  |                                |         |                             |         |                                        |         |                               |         |
| Yes                       | 0.97(0.84-1.11)                | 0.63    | 1.01(0.86-1.19)             | 0.92    | 1.15(0.83-1.59)                        | 0.39    | 1.24(0.94-1.65)               | 0.13    |
| No                        | ref                            |         | ref                         |         | ref                                    |         | ref                           |         |
| Hypertension              |                                |         |                             |         |                                        |         |                               |         |
| Yes                       | 0.93(0.85-1.03)                | 0.20    | 1.02(0.91-1.14)             | 0.72    | 1.03(0.82-1.30)                        | 0.78    | 1.05(0.90-1.23)               | 0.53    |



|    |                             |                 |       |                 |       |                 |       |                 |       |
|----|-----------------------------|-----------------|-------|-----------------|-------|-----------------|-------|-----------------|-------|
| 1  |                             |                 |       |                 |       |                 |       |                 |       |
| 2  |                             |                 |       |                 |       |                 |       |                 |       |
| 3  | No                          | ref             |       | ref             |       | ref             |       | ref             |       |
| 4  | Dyslipidemia                |                 |       |                 |       |                 |       |                 |       |
| 5  | Yes                         | 0.89(0.69-1.14) | 0.35  | 0.99(0.73-1.34) | 0.94  | 0.70(0.41-1.17) | 0.17  | 0.66(0.42-1.03) | 0.07  |
| 6  | No                          | ref             |       | ref             |       | ref             |       | ref             |       |
| 7  |                             |                 |       |                 |       |                 |       |                 |       |
| 8  |                             |                 |       |                 |       |                 |       |                 |       |
| 9  | Time trend (every 6 months) | 1.02(0.96-1.04) | 0.88  | 0.82(0.76-0.88) | <0.01 | 1.01(0.91-1.12) | 0.80  | 0.91(0.83-1.00) | 0.05  |
| 10 | Symptom onset time          |                 |       |                 |       |                 |       |                 |       |
| 11 | 00:00-05:59                 | 1.99(1.74-2.26) | <0.01 |                 |       |                 |       |                 |       |
| 12 | 06:00-11:59                 | 1.50(1.32-1.70) | <0.01 |                 |       |                 |       |                 |       |
| 13 | 12:00-17:59                 | ref             |       |                 |       |                 |       |                 |       |
| 14 | 18:00-23:59                 | 1.01(0.89-1.13) | 0.93  |                 |       |                 |       |                 |       |
| 15 | Signs at admission          |                 |       |                 |       |                 |       |                 |       |
| 16 | SBP < 90 mmHg               |                 |       |                 |       |                 |       |                 |       |
| 17 | Yes                         | 0.66(0.54-0.80) | <0.01 | 0.79(0.61-1.02) | 0.07  | 0.88(0.59-1.31) | 0.53  | 0.88(0.62-1.26) | 0.50  |
| 18 | No                          | ref             |       | ref             |       | ref             |       | ref             |       |
| 19 | Heart rate ≥ 100 beats/m    |                 |       |                 |       |                 |       |                 |       |
| 20 | Yes                         | 1.73(1.50-2.00) | <0.01 | 1.07(0.92-1.24) | 0.36  | 1.52(0.97-2.40) | 0.07  | 1.32(0.92-1.88) | 0.13  |
| 21 | No                          | ref             |       | ref             |       | ref             |       | ref             |       |
| 22 | Arrived on regular hours    |                 |       |                 |       |                 |       |                 |       |
| 23 | Yes                         |                 |       | 1.14(1.03-1.26) | <0.01 | 0.93(0.76-1.14) | 0.49  | 0.80(0.69-0.94) | <0.01 |
| 24 | No                          |                 |       | ref             |       | ref             |       | ref             |       |
| 25 | Onset-to-Door time delay    |                 |       |                 |       |                 |       |                 |       |
| 26 | Yes                         |                 |       | 1.19(1.03-1.38) | 0.02  | 0.79(0.66-0.96) | 0.02  | 0.87(0.74-1.03) | 0.11  |
| 27 | No                          |                 |       | ref             |       | ref             |       | ref             |       |
| 28 | Door-to-ECG time delay      |                 |       |                 |       |                 |       |                 |       |
| 29 | Yes                         |                 |       |                 |       | 0.56(0.40-0.77) | <0.01 | 3.51(2.59-4.75) | <0.01 |
| 30 | No                          |                 |       |                 |       | ref             |       | -               |       |
| 31 | Intervention group          |                 |       |                 |       |                 |       |                 |       |
| 32 | Yes                         | 1.02(0.88-1.18) | 0.79  | 0.59(0.45-0.78) | <0.01 | 1.06(0.76-1.47) | 0.73  | 0.70(0.54-0.91) | <0.01 |
| 33 | No                          | ref             |       | ref             |       | ref             |       | ref             |       |

ECG, electrocardiograph; OR, odds ratio; SBP, systolic blood pressure.

\*, the intervention of the third phase of the Clinical Pathways for Acute Coronary Syndromes study.

Supplementary Table 2. Total ischemic time by groups of time from arrival to first ECG.

| Time from arrival to first ECG (min.) | No. of patients | Total ischemic time (mean±SD, min.) |
|---------------------------------------|-----------------|-------------------------------------|
| 0-4.9                                 | 1625            | 303.8±423.4                         |
| 5.0-9.9                               | 538             | 278.8±354.1                         |
| 10.0-14.9                             | 269             | 347.3±473.9                         |
| 15.0-19.9                             | 125             | 297.4±327.6                         |
| 20.0-24.9                             | 112             | 321.6±427.2                         |
| 25.0-29.9                             | 48              | 243.0±152.8                         |
| ≥30.0                                 | 340             | 472.4±660.5                         |

For peer review only

Supplementary Table 3. Total ischemic time by groups of time from first ECG to thrombolytic therapy.

| Time from first ECG to thrombolytic therapy (min.) | No. of patients | Total ischemic time (mean $\pm$ SD, min.) |
|----------------------------------------------------|-----------------|-------------------------------------------|
| 0-4.9                                              | 183             | 320 $\pm$ 449.7                           |
| 5.0-9.9                                            | 133             | 262.5 $\pm$ 344.1                         |
| 10.0-14.9                                          | 220             | 247.2 $\pm$ 257.2                         |
| 15.0-19.9                                          | 184             | 252.1 $\pm$ 324.8                         |
| 20.0-24.9                                          | 249             | 260.4 $\pm$ 380.5                         |
| 25.0-29.9                                          | 193             | 234.2 $\pm$ 284.3                         |
| 30.0-34.9                                          | 235             | 331.2 $\pm$ 509.4                         |
| 35.0-39.9                                          | 163             | 300.5 $\pm$ 494.4                         |
| 40.0-49.9                                          | 329             | 329.3 $\pm$ 544.4                         |
| 50.0-59.9                                          | 256             | 302.0 $\pm$ 431.4                         |
| 60.0-119.9                                         | 658             | 370.4 $\pm$ 498.3                         |
| 120.0-179.9                                        | 176             | 426.9 $\pm$ 415.6                         |
| $\geq$ 180.0                                       | 78              | 603.4 $\pm$ 510.5                         |

Supplementary Table 4. Total ischemic time by groups of time from arrival to thrombolytic therapy.

| Time from arrival to thrombolytic therapy (min.) | No. of patients | Total ischemic time (mean±SD, min.) |
|--------------------------------------------------|-----------------|-------------------------------------|
| 0-9.9                                            | 114             | 298.9±467.9                         |
| 10.0-19.9                                        | 311             | 225.9±220.7                         |
| 20.0-29.9                                        | 386             | 254.5±344.3                         |
| 30.0-59.9                                        | 1036            | 296.4±458.2                         |
| 60.0-119.9                                       | 837             | 332.5±421.8                         |
| 120.0-179.9                                      | 240             | 397.5±431.6                         |
| 180.0-359.9                                      | 121             | 614.5±553.8                         |
| 360.0-719.9                                      | 8               | 1701.5±1481.4                       |
| ≥720.0                                           | 4               | 2861.5±1229.1                       |

**STROBE 2007 (v4) Statement—Checklist of items that should be included in reports of *cross-sectional studies***

| Section/Topic                | Item # | Recommendation                                                                                                                                                                       | Reported on page # |
|------------------------------|--------|--------------------------------------------------------------------------------------------------------------------------------------------------------------------------------------|--------------------|
| <b>Title and abstract</b>    | 1      | (a) Indicate the study's design with a commonly used term in the title or the abstract                                                                                               | 2                  |
|                              |        | (b) Provide in the abstract an informative and balanced summary of what was done and what was found                                                                                  | 2                  |
| <b>Introduction</b>          |        |                                                                                                                                                                                      |                    |
| Background/rationale         | 2      | Explain the scientific background and rationale for the investigation being reported                                                                                                 | 4-5                |
| Objectives                   | 3      | State specific objectives, including any prespecified hypotheses                                                                                                                     | 5                  |
| <b>Methods</b>               |        |                                                                                                                                                                                      |                    |
| Study design                 | 4      | Present key elements of study design early in the paper                                                                                                                              | 5                  |
| Setting                      | 5      | Describe the setting, locations, and relevant dates, including periods of recruitment, exposure, follow-up, and data collection                                                      | 5-6                |
| Participants                 | 6      | (a) Give the eligibility criteria, and the sources and methods of selection of participants                                                                                          | 5                  |
| Variables                    | 7      | Clearly define all outcomes, exposures, predictors, potential confounders, and effect modifiers. Give diagnostic criteria, if applicable                                             | 6-7                |
| Data sources/<br>measurement | 8*     | For each variable of interest, give sources of data and details of methods of assessment (measurement). Describe comparability of assessment methods if there is more than one group | 6                  |
| Bias                         | 9      | Describe any efforts to address potential sources of bias                                                                                                                            | 6                  |
| Study size                   | 10     | Explain how the study size was arrived at                                                                                                                                            | NA                 |
| Quantitative variables       | 11     | Explain how quantitative variables were handled in the analyses. If applicable, describe which groupings were chosen and why                                                         | 6-7                |
| Statistical methods          | 12     | (a) Describe all statistical methods, including those used to control for confounding                                                                                                | 7                  |
|                              |        | (b) Describe any methods used to examine subgroups and interactions                                                                                                                  | NA                 |
|                              |        | (c) Explain how missing data were addressed                                                                                                                                          | 7                  |
|                              |        | (d) If applicable, describe analytical methods taking account of sampling strategy                                                                                                   | NA                 |
|                              |        | (e) Describe any sensitivity analyses                                                                                                                                                | NA                 |
| <b>Results</b>               |        |                                                                                                                                                                                      |                    |

|                          |     |                                                                                                                                                                                                              |                |
|--------------------------|-----|--------------------------------------------------------------------------------------------------------------------------------------------------------------------------------------------------------------|----------------|
| Participants             | 13* | (a) Report numbers of individuals at each stage of study—eg numbers potentially eligible, examined for eligibility, confirmed eligible, included in the study, completing follow-up, and analysed            | 6 and figure 1 |
|                          |     | (b) Give reasons for non-participation at each stage                                                                                                                                                         | figure 1       |
|                          |     | (c) Consider use of a flow diagram                                                                                                                                                                           | figure 1       |
| Descriptive data         | 14* | (a) Give characteristics of study participants (eg demographic, clinical, social) and information on exposures and potential confounders                                                                     | Table 1        |
|                          |     | (b) Indicate number of participants with missing data for each variable of interest                                                                                                                          | Table 1        |
| Outcome data             | 15* | Report numbers of outcome events or summary measures                                                                                                                                                         | 9 table 2      |
| Main results             | 16  | (a) Give unadjusted estimates and, if applicable, confounder-adjusted estimates and their precision (eg, 95% confidence interval). Make clear which confounders were adjusted for and why they were included | Table 2        |
|                          |     | (b) Report category boundaries when continuous variables were categorized                                                                                                                                    | Table 3        |
|                          |     | (c) If relevant, consider translating estimates of relative risk into absolute risk for a meaningful time period                                                                                             | NA             |
| Other analyses           | 17  | Report other analyses done—eg analyses of subgroups and interactions, and sensitivity analyses                                                                                                               | NA             |
| <b>Discussion</b>        |     |                                                                                                                                                                                                              |                |
| Key results              | 18  | Summarise key results with reference to study objectives                                                                                                                                                     | 14-15          |
| Limitations              | 19  | Discuss limitations of the study, taking into account sources of potential bias or imprecision. Discuss both direction and magnitude of any potential bias                                                   | 19             |
| Interpretation           | 20  | Give a cautious overall interpretation of results considering objectives, limitations, multiplicity of analyses, results from similar studies, and other relevant evidence                                   | 19-20          |
| Generalisability         | 21  | Discuss the generalisability (external validity) of the study results                                                                                                                                        | 19             |
| <b>Other information</b> |     |                                                                                                                                                                                                              |                |
| Funding                  | 22  | Give the source of funding and the role of the funders for the present study and, if applicable, for the original study on which the present article is based                                                | 21             |

\*Give information separately for cases and controls in case-control studies and, if applicable, for exposed and unexposed groups in cohort and cross-sectional studies.

**Note:** An Explanation and Elaboration article discusses each checklist item and gives methodological background and published examples of transparent reporting. The STROBE checklist is best used in conjunction with this article (freely available on the Web sites of PLoS Medicine at <http://www.plosmedicine.org/>, Annals of Internal Medicine at <http://www.annals.org/>, and Epidemiology at <http://www.epidem.com/>). Information on the STROBE Initiative is available at [www.strobe-statement.org](http://www.strobe-statement.org).
