# Supplementary material for: Prehospital and in-hospital delays to care and associated factors in patients with STEMI: an observational study in 101 non-PCI hospitals in China
Source: PubMed Central journal article supplement — BMJ Open. 2019 Nov 10;9(11):e031918. doi: 10.1136/bmjopen-2019-031918 (PMC6858215; doi:10.1136/bmjopen-2019-031918), 2019-11-10
Supplement: bmjopen-2019-031918supp001.pdf [file bmjopen-2019-031918supp001.pdf]

Supplementary Table 1. Univariate analyses of four kinds of delays, using logistic regression with generalized estimating equations.

|                                  | Pre-hospital delay<br>(N=7312) |         | First ECG delay<br>(N=7312) |         | Thrombolytic therapy delay<br>(N=3057) |         | In-hospital delay<br>(N=3057) |         |
|----------------------------------|--------------------------------|---------|-----------------------------|---------|----------------------------------------|---------|-------------------------------|---------|
|                                  | OR (95% CI)                    | P value | OR (95% CI)                 | P value | OR (95% CI)                            | P value | OR (95% CI)                   | P value |
| <b>Gender</b>                    |                                |         |                             |         |                                        |         |                               |         |
| Female                           | 1.56(1.38-1.76)                | <0.01   | 1.13(1.01-1.26)             | 0.04    | 0.98(0.76-1.26)                        | 0.86    | 0.96(0.80-1.13)               | 0.60    |
| Male                             | ref                            |         | ref                         |         | ref                                    |         | ref                           |         |
| <b>Age</b>                       |                                |         |                             |         |                                        |         |                               |         |
| ≥65 years old                    | 1.75(1.58-1.94)                | <0.01   | 1.13(1.00-1.28)             | 0.05    | 0.93(0.74-1.18)                        | 0.56    | 1.07(0.87-1.30)               | 0.52    |
| <65 years old                    | ref                            |         | ref                         |         | ref                                    |         | ref                           |         |
| <b>Education level</b>           |                                |         |                             |         |                                        |         |                               |         |
| Illiteracy                       | 1.92(1.58-2.34)                | <0.01   | 1.18(0.98-1.43)             | 0.08    | 0.87(0.62-1.21)                        | 0.40    | 1.03(0.79-1.33)               | 0.83    |
| Others                           | ref                            |         | ref                         |         | ref                                    |         | ref                           |         |
| <b>Occupation</b>                |                                |         |                             |         |                                        |         |                               |         |
| Farmer                           | 1.74(1.48-2.06)                | <0.01   | 1.06(0.88-1.28)             | 0.53    | 1.13(0.84-1.53)                        | 0.40    | 1.03(0.79-1.34)               | 0.80    |
| Others                           | ref                            |         | ref                         |         | ref                                    |         | ref                           |         |
| <b>Medical insurance</b>         |                                |         |                             |         |                                        |         |                               |         |
| Yes                              | 1.08(0.72-1.64)                | 0.70    | 1.19(0.85-1.68)             | 0.31    | 0.69(0.33-1.43)                        | 0.31    | 0.81(0.49-1.33)               | 0.41    |
| No                               | ref                            |         | ref                         |         | ref                                    |         | ref                           |         |
| <b>Smoking status</b>            |                                |         |                             |         |                                        |         |                               |         |
| Current smoking                  | 0.78(0.68-0.89)                | <0.01   | 0.85(0.72-1.00)             | 0.05    | 1.03(0.77-1.38)                        | 0.82    | 1.06(0.80-1.41)               | 0.67    |
| Others                           | ref                            |         | ref                         |         | ref                                    |         | ref                           |         |
| <b>History of disease</b>        |                                |         |                             |         |                                        |         |                               |         |
| <b>Myocardial infarction</b>     |                                |         |                             |         |                                        |         |                               |         |
| Yes                              | 0.68(0.54-0.86)                | <0.01   | 1.14(0.90-1.44)             | 0.28    | 1.11(0.67-1.81)                        | 0.69    | 1.23(0.84-1.79)               | 0.29    |
| No                               | ref                            |         | ref                         |         | ref                                    |         | ref                           |         |
| <b>Angina</b>                    |                                |         |                             |         |                                        |         |                               |         |
| Yes                              | 0.87(0.74-1.01)                | 0.07    | 0.86(0.71-1.06)             | 0.15    | 0.87(0.61-1.24)                        | 0.46    | 0.86(0.61-1.21)               | 0.38    |
| No                               | ref                            |         | ref                         |         | ref                                    |         | ref                           |         |
| <b>Stroke</b>                    |                                |         |                             |         |                                        |         |                               |         |
| Yes                              | 1.15(0.97-1.36)                | 0.11    | 0.92(0.76-1.13)             | 0.44    | 1.28(0.82-1.98)                        | 0.27    | 1.25(0.88-1.76)               | 0.21    |
| No                               | ref                            |         | ref                         |         | ref                                    |         | ref                           |         |
| <b>Heart failure</b>             |                                |         |                             |         |                                        |         |                               |         |
| Yes                              | 1.30(0.86-1.97)                | 0.21    | 0.96(0.63-1.47)             | 0.86    | 0.71(0.25-2.02)                        | 0.53    | 1.05(0.37-2.93)               | 0.93    |
| No                               | ref                            |         | ref                         |         | ref                                    |         | ref                           |         |
| <b>Transient ischemic attack</b> |                                |         |                             |         |                                        |         |                               |         |
| Yes                              | 0.80(0.53-1.23)                | 0.32    | 0.88(0.48-1.61)             | 0.68    | 1.19(0.55-2.58)                        | 0.65    | 0.67(0.34-1.31)               | 0.24    |
| No                               | ref                            |         | ref                         |         | ref                                    |         | ref                           |         |
| <b>Diabetes</b>                  |                                |         |                             |         |                                        |         |                               |         |
| Yes                              | 0.97(0.84-1.11)                | 0.63    | 1.01(0.86-1.19)             | 0.92    | 1.15(0.83-1.59)                        | 0.39    | 1.24(0.94-1.65)               | 0.13    |
| No                               | ref                            |         | ref                         |         | ref                                    |         | ref                           |         |
| <b>Hypertension</b>              |                                |         |                             |         |                                        |         |                               |         |
| Yes                              | 0.93(0.85-1.03)                | 0.20    | 1.02(0.91-1.14)             | 0.72    | 1.03(0.82-1.30)                        | 0.78    | 1.05(0.90-1.23)               | 0.53    |

|                             |                 |       |                 |       |                 |       |                 |       |
|-----------------------------|-----------------|-------|-----------------|-------|-----------------|-------|-----------------|-------|
| No                          | ref             |       | ref             |       | ref             |       | ref             |       |
| Dyslipidemia                |                 |       |                 |       |                 |       |                 |       |
| Yes                         | 0.89(0.69-1.14) | 0.35  | 0.99(0.73-1.34) | 0.94  | 0.70(0.41-1.17) | 0.17  | 0.66(0.42-1.03) | 0.07  |
| No                          | ref             |       | ref             |       | ref             |       | ref             |       |
| Time trend (every 6 months) | 1.02(0.96-1.04) | 0.88  | 0.82(0.76-0.88) | <0.01 | 1.01(0.91-1.12) | 0.80  | 0.91(0.83-1.00) | 0.05  |
| Symptom onset time          |                 |       |                 |       |                 |       |                 |       |
| 00:00-05:59                 | 1.99(1.74-2.26) | <0.01 |                 |       |                 |       |                 |       |
| 06:00-11:59                 | 1.50(1.32-1.70) | <0.01 |                 |       |                 |       |                 |       |
| 12:00-17:59                 | ref             |       |                 |       |                 |       |                 |       |
| 18:00-23:59                 | 1.01(0.89-1.13) | 0.93  |                 |       |                 |       |                 |       |
| Signs at admission          |                 |       |                 |       |                 |       |                 |       |
| SBP < 90 mmHg               |                 |       |                 |       |                 |       |                 |       |
| Yes                         | 0.66(0.54-0.80) | <0.01 | 0.79(0.61-1.02) | 0.07  | 0.88(0.59-1.31) | 0.53  | 0.88(0.62-1.26) | 0.50  |
| No                          | ref             |       | ref             |       | ref             |       | ref             |       |
| Heart rate ≥ 100 beats/m    |                 |       |                 |       |                 |       |                 |       |
| Yes                         | 1.73(1.50-2.00) | <0.01 | 1.07(0.92-1.24) | 0.36  | 1.52(0.97-2.40) | 0.07  | 1.32(0.92-1.88) | 0.13  |
| No                          | ref             |       | ref             |       | ref             |       | ref             |       |
| Arrived on regular hours    |                 |       |                 |       |                 |       |                 |       |
| Yes                         |                 |       | 1.14(1.03-1.26) | <0.01 | 0.93(0.76-1.14) | 0.49  | 0.80(0.69-0.94) | <0.01 |
| No                          |                 |       | ref             |       | ref             |       | ref             |       |
| Onset-to-Door time delay    |                 |       |                 |       |                 |       |                 |       |
| Yes                         |                 |       | 1.19(1.03-1.38) | 0.02  | 0.79(0.66-0.96) | 0.02  | 0.87(0.74-1.03) | 0.11  |
| No                          |                 |       | ref             |       | ref             |       | ref             |       |
| Door-to-ECG time delay      |                 |       |                 |       |                 |       |                 |       |
| Yes                         |                 |       |                 |       | 0.56(0.40-0.77) | <0.01 | 3.51(2.59-4.75) | <0.01 |
| No                          |                 |       |                 |       | ref             |       | -               |       |
| Intervention group          |                 |       |                 |       |                 |       |                 |       |
| Yes                         | 1.02(0.88-1.18) | 0.79  | 0.59(0.45-0.78) | <0.01 | 1.06(0.76-1.47) | 0.73  | 0.70(0.54-0.91) | <0.01 |
| No                          | ref             |       | ref             |       | ref             |       | ref             |       |

ECG, electrocardiograph; OR, odds ratio; SBP, systolic blood pressure.

\*, the intervention of the third phase of the Clinical Pathways for Acute Coronary Syndromes study.
