# Supplementary material for: Prehospital and in-hospital delays to care and associated factors in patients with STEMI: an observational study in 101 non-PCI hospitals in China
Source: PubMed Central journal article supplement — BMJ Open. 2019 Nov 10;9(11):e031918. doi: 10.1136/bmjopen-2019-031918 (PMC6858215; doi:10.1136/bmjopen-2019-031918), 2019-11-10
Supplement: bmjopen-2019-031918supp002.pdf [file bmjopen-2019-031918supp002.pdf]

Supplementary Table 2. Total ischemic time by groups of time from arrival to first ECG.

| Time from arrival to first ECG (min.) | No. of patients | Total ischemic time (mean±SD, min.) |
|---------------------------------------|-----------------|-------------------------------------|
| 0-4.9                                 | 1625            | 303.8±423.4                         |
| 5.0-9.9                               | 538             | 278.8±354.1                         |
| 10.0-14.9                             | 269             | 347.3±473.9                         |
| 15.0-19.9                             | 125             | 297.4±327.6                         |
| 20.0-24.9                             | 112             | 321.6±427.2                         |
| 25.0-29.9                             | 48              | 243.0±152.8                         |
| ≥30.0                                 | 340             | 472.4±660.5                         |
