# Supplementary material for: Prehospital and in-hospital delays to care and associated factors in patients with STEMI: an observational study in 101 non-PCI hospitals in China
Source: PubMed Central journal article supplement — BMJ Open. 2019 Nov 10;9(11):e031918. doi: 10.1136/bmjopen-2019-031918 (PMC6858215; doi:10.1136/bmjopen-2019-031918), 2019-11-10
Supplement: bmjopen-2019-031918supp003.pdf [file bmjopen-2019-031918supp003.pdf]

Supplementary Table 3. Total ischemic time by groups of time from first ECG to thrombolytic therapy.

| Time from first ECG to thrombolytic therapy (min.) | No. of patients | Total ischemic time (mean±SD, min.) |
|----------------------------------------------------|-----------------|-------------------------------------|
| 0-4.9                                              | 183             | 320±449.7                           |
| 5.0-9.9                                            | 133             | 262.5±344.1                         |
| 10.0-14.9                                          | 220             | 247.2±257.2                         |
| 15.0-19.9                                          | 184             | 252.1±324.8                         |
| 20.0-24.9                                          | 249             | 260.4±380.5                         |
| 25.0-29.9                                          | 193             | 234.2±284.3                         |
| 30.0-34.9                                          | 235             | 331.2±509.4                         |
| 35.0-39.9                                          | 163             | 300.5±494.4                         |
| 40.0-49.9                                          | 329             | 329.3±544.4                         |
| 50.0-59.9                                          | 256             | 302.0±431.4                         |
| 60.0-119.9                                         | 658             | 370.4±498.3                         |
| 120.0-179.9                                        | 176             | 426.9±415.6                         |
| ≥180.0                                             | 78              | 603.4±510.5                         |
