# Supplementary material for: Prehospital and in-hospital delays to care and associated factors in patients with STEMI: an observational study in 101 non-PCI hospitals in China
Source: PubMed Central journal article supplement — BMJ Open. 2019 Nov 10;9(11):e031918. doi: 10.1136/bmjopen-2019-031918 (PMC6858215; doi:10.1136/bmjopen-2019-031918), 2019-11-10
Supplement: bmjopen-2019-031918supp004.pdf [file bmjopen-2019-031918supp004.pdf]

Supplementary Table 4. Total ischemic time by groups of time from arrival to thrombolytic therapy.

| Time from arrival to thrombolytic therapy (min.) | No. of patients | Total ischemic time (mean±SD, min.) |
|--------------------------------------------------|-----------------|-------------------------------------|
| 0-9.9                                            | 114             | 298.9±467.9                         |
| 10.0-19.9                                        | 311             | 225.9±220.7                         |
| 20.0-29.9                                        | 386             | 254.5±344.3                         |
| 30.0-59.9                                        | 1036            | 296.4±458.2                         |
| 60.0-119.9                                       | 837             | 332.5±421.8                         |
| 120.0-179.9                                      | 240             | 397.5±431.6                         |
| 180.0-359.9                                      | 121             | 614.5±553.8                         |
| 360.0-719.9                                      | 8               | 1701.5±1481.4                       |
| ≥720.0                                           | 4               | 2861.5±1229.1                       |
